# Supplementary material
Source: publisher figshare collection journal article supplement (https://acs.figshare.com/ndownloader/files/20973339)
Supplement: Supplementary file 1 [file 20973339]

# Pore-scale Modeling of Nucleation and Growth in Porous Media

*Hossein Fazeli<sup>1\*</sup>, Mohammad Masoudi<sup>1</sup>, Ravi A. Patel<sup>3</sup>, Per Aagaard<sup>1</sup>, and Helge Hellevang<sup>1, 2</sup>*

<sup>1</sup>Department of Geosciences, University of Oslo, Pb. 1047, Blindern, Oslo, Norway.

<sup>2</sup>The University Centre in Svalbard (UNIS), Pb. 156, N-9171 Longyearbyen, Norway.

<sup>3</sup>Laboratory for waste management (LES), Paul Scherrer Institute, CH-5232, Villigen-PSI,  
Switzerland

\*Email: [Hossein.Fazeli@geo.uio.no](mailto:Hossein.Fazeli@geo.uio.no),

\*Email: [ravi-ajitbhai.patel@psi.ch](mailto:ravi-ajitbhai.patel@psi.ch)

## Table of contents

|                      |   |
|----------------------|---|
| List of figures..... | 1 |
| List of Tables.....  | 3 |

## List of Figures

**Figure S1. The concentration profile of A(aq) in mol.L<sup>-1</sup> for  $\Omega = 69$ , 73, and 80 at t = 45 minutes. The kinetic rate constant for this case is  $5 \times 10^{-5}$  [mol.m<sup>-2</sup>.s<sup>-1</sup>]. The initial average flow velocity is  $4.6 \times 10^{-7}$  [m.s<sup>-1</sup>] for this scenario.....**5

**Figure S2. The concentration profile of A(aq) in mol.L<sup>-1</sup> for  $\Omega = 69$ , 73, and 80 at t = 90 minutes. The kinetic rate constant for this case is  $5 \times 10^{-5}$  [mol.m<sup>-2</sup>.s<sup>-1</sup>]. The initial average flow velocity is  $4.6 \times 10^{-7}$  [m.s<sup>-1</sup>] for this scenario.....**6

**Figure S3. The concentration profile of A(aq) in mol.L<sup>-1</sup> for  $\Omega = 69$ , 73, and 80 at t = 135 minutes. The kinetic rate constant for this case is  $5 \times 10^{-5}$  [mol.m<sup>-2</sup>.s<sup>-1</sup>]. The initial average flow velocity is  $4.6 \times 10^{-7}$  [m.s<sup>-1</sup>] for this scenario.....**7

|                                                                                                                                                                                                                                                                                                                                                                 |    |
|-----------------------------------------------------------------------------------------------------------------------------------------------------------------------------------------------------------------------------------------------------------------------------------------------------------------------------------------------------------------|----|
| Figure S4. The temporal evolution of concentration profile of A(aq) in mol.L <sup>-1</sup> for $\Omega = 69$ at $t = 16.7, 19.4$ , and 25 minutes. The kinetic rate constant for this case is $5 \times 10^{-5}$ [mol.m <sup>-2</sup> .s <sup>-1</sup> ]. The initial average flow velocity is $4.6 \times 10^{-7}$ [m.s <sup>-1</sup> ] for this scenario..... | 8  |
| Figure S5. The concentration profile of A(aq) in mol.L <sup>-1</sup> for $\Omega = 69, 73$ , and 80 at $t = 45$ minutes. The kinetic rate constant for this case is $5 \times 10^{-6}$ [mol.m <sup>-2</sup> .s <sup>-1</sup> ]. The initial average flow velocity is $4.6 \times 10^{-7}$ [m.s <sup>-1</sup> ] for this scenario.....                           | 9  |
| Figure S6. The concentration profile of A(aq) in mol.L <sup>-1</sup> for $\Omega = 69, 73$ , and 80 at $t = 90$ minutes. The kinetic rate constant for this case is $5 \times 10^{-6}$ [mol.m <sup>-2</sup> .s <sup>-1</sup> ]. The initial average flow velocity is $4.6 \times 10^{-7}$ [m.s <sup>-1</sup> ] for this scenario.....                           | 10 |
| Figure S7. The concentration profile of A(aq) in mol.L <sup>-1</sup> for $\Omega = 69, 73$ , and 80 at $t = 135$ minutes. The kinetic rate constant for this case is $5 \times 10^{-6}$ [mol.m <sup>-2</sup> .s <sup>-1</sup> ]. The initial average flow velocity is $4.6 \times 10^{-7}$ [m.s <sup>-1</sup> ] for this scenario.....                          | 11 |
| Figure S8. Temporal evolution of the amount of precipitated mineral in mol.L <sup>-1</sup> for $\Omega = 73$ at $t = 45, 90$ , and 135 minutes. The kinetic rate constant for this case is $5 \times 10^{-5}$ [mol.m <sup>-2</sup> .s <sup>-1</sup> ]. The initial average flow velocity is $2.3 \times 10^{-6}$ [m.s <sup>-1</sup> ] for this scenario.....    | 12 |
| Figure S9. Temporal evolution of the amount of precipitated mineral in mol.L <sup>-1</sup> for $\Omega = 80$ at $t = 45, 90$ , and 135 minutes. The kinetic rate constant for this case is $5 \times 10^{-5}$ [mol.m <sup>-2</sup> .s <sup>-1</sup> ]. The initial average flow velocity is $2.3 \times 10^{-6}$ [m.s <sup>-1</sup> ] for this scenario.....    | 13 |
| Figure S10. Temporal evolution of the amount of precipitated mineral in mol.L <sup>-1</sup> for $\Omega = 69$ at $t = 45, 90$ , and 135 minutes. The kinetic rate constant for this case is $5 \times 10^{-6}$ [mol.m <sup>-2</sup> .s <sup>-1</sup> ]. The initial average flow velocity is $2.3 \times 10^{-6}$ [m.s <sup>-1</sup> ] for this scenario.....   | 14 |
| Figure S11. Temporal evolution of the amount of precipitated mineral in mol.L <sup>-1</sup> for $\Omega = 73$ at $t = 45, 90$ , and 135 minutes. The kinetic rate constant for this case is $5 \times 10^{-6}$ [mol.m <sup>-2</sup> .s <sup>-1</sup> ]. The initial average flow velocity is $2.3 \times 10^{-6}$ [m.s <sup>-1</sup> ] for this scenario.....   | 15 |
| Figure S12. Temporal evolution of the amount of precipitated mineral in mol.L <sup>-1</sup> for $\Omega = 80$ at $t = 45, 90$ , and 135 minutes. The kinetic rate constant for this case is $5 \times 10^{-6}$ [mol.m <sup>-2</sup> .s <sup>-1</sup> ]. The initial average flow velocity is $2.3 \times 10^{-6}$ [m.s <sup>-1</sup> ] for this scenario.....   | 16 |
| Figure S13. The temporal evolution of concentration profile of A(aq) in mol.L <sup>-1</sup> for $\Omega = 69$ at $t = 45, 90$ , and 135 minutes. The kinetic rate constant for this case is $5 \times 10^{-5}$ [mol.m <sup>-2</sup> .s <sup>-1</sup> ]. The initial average flow velocity is $2.3 \times 10^{-6}$ [m.s <sup>-1</sup> ] for this scenario.....   | 17 |
| Figure S14. The temporal evolution of concentration profile of A(aq) in mol.L <sup>-1</sup> for $\Omega = 73$ at $t = 45, 90$ , and 135 minutes. The kinetic rate constant for this case is $5 \times 10^{-5}$ [mol.m <sup>-2</sup> .s <sup>-1</sup> ]. The initial average flow velocity is $2.3 \times 10^{-6}$ [m.s <sup>-1</sup> ] for this scenario.....   | 18 |
| Figure S15. The temporal evolution of concentration profile of A(aq) in mol.L <sup>-1</sup> for $\Omega = 80$ at $t = 45, 90$ , and 135 minutes. The kinetic rate constant for this case is $5 \times 10^{-5}$ [mol.m <sup>-2</sup> .s <sup>-1</sup> ]. The initial average flow velocity is $4.6 \times 10^{-7}$ [m.s <sup>-1</sup> ] for this scenario.....   | 19 |

|                                                                                                                                                                                                                                                                                                                                                                                                                                      |    |
|--------------------------------------------------------------------------------------------------------------------------------------------------------------------------------------------------------------------------------------------------------------------------------------------------------------------------------------------------------------------------------------------------------------------------------------|----|
| Figure S16. The temporal evolution of concentration profile of A(aq) in mol.L <sup>-1</sup> for $\Omega = 69$ at t = 45, 90, and 135 minutes. The kinetic rate constant for this case is $5 \times 10^{-6}$ [mol.m <sup>-2</sup> .s <sup>-1</sup> ]. The initial average flow velocity is $2.3 \times 10^{-6}$ [m.s <sup>-1</sup> ] for this scenario.....                                                                           | 20 |
| Figure S17. The temporal evolution of concentration profile of A(aq) in mol.L <sup>-1</sup> for $\Omega = 73$ at t = 45, 90, and 135 minutes. The kinetic rate constant for this case is $5 \times 10^{-6}$ [mol.m <sup>-2</sup> .s <sup>-1</sup> ]. The initial average flow velocity is $2.3 \times 10^{-6}$ [m.s <sup>-1</sup> ] for this scenario.....                                                                           | 21 |
| Figure S18. The temporal evolution of concentration profile of A(aq) in mol.L <sup>-1</sup> for $\Omega = 80$ at t = 45, 90, and 135 minutes. The kinetic rate constant for this case is $5 \times 10^{-6}$ [mol.m <sup>-2</sup> .s <sup>-1</sup> ]. The initial average flow velocity is $2.3 \times 10^{-6}$ [m.s <sup>-1</sup> ] for this scenario.....                                                                           | 22 |
| Figure S19. The temporal evolution of concentration profile of A(aq) in mol.L <sup>-1</sup> for $\Omega = 69$ at t = 8.8, 11.65, and 15 minutes. The kinetic rate constant for this case is $5 \times 10^{-5}$ [mol.m <sup>-2</sup> .s <sup>-1</sup> ]. The initial average flow velocity is $2.3 \times 10^{-6}$ [m.s <sup>-1</sup> ] for this scenario.....                                                                        | 23 |
| Figure S20. The temporal evolution of concentration profile of A(aq) in mol.L <sup>-1</sup> for $\Omega = 69$ at t = 71, 72.15, and 73.26 minutes where deterministic approach is used for the nucleation calculations. The kinetic rate constant for this case is $5 \times 10^{-5}$ [mol.m <sup>-2</sup> .s <sup>-1</sup> ]. The initial average flow velocity is $4.6 \times 10^{-7}$ [m.s <sup>-1</sup> ] for this scenario..... | 24 |
| Figure S21. The amount of precipitated mineral in mol.L <sup>-1</sup> for $\Omega = 69, 73$ , and 80 when they all have the same normalized porosity = 0.94. The kinetic rate constant for this case is $5 \times 10^{-5}$ [mol.m <sup>-2</sup> .s <sup>-1</sup> ]. The initial average flow velocity is $2.3 \times 10^{-6}$ [m.s <sup>-1</sup> ] for this scenario.....                                                            | 25 |
| Figure S22. The velocity profile for $\Omega = 69, 73$ , and 80 when they all have the same normalized porosity = 0.94. The kinetic rate constant for this case is $5 \times 10^{-5}$ [mol.m <sup>-2</sup> .s <sup>-1</sup> ]. The initial average flow velocity is $2.3 \times 10^{-6}$ [m.s <sup>-1</sup> ] for this scenario.....                                                                                                 | 26 |
| Figure S23. Temporal evolution of the amount of precipitated mineral in mol.L <sup>-1</sup> for SI = 1.23 at t = 4.2, 12.2, and 24.5 minutes. In this case kinetic rate for calcite rate equation is 9 orders of magnitude higher than the real value. The initial average flow velocity is $4.6 \times 10^{-7}$ [m.s <sup>-1</sup> ] for this scenario.....                                                                         | 27 |
| Figure S24. Temporal evolution of the amount of precipitated mineral in mol.L <sup>-1</sup> for SI = 1.13 at t = 4.2, 12.2, and 24.5 minutes. In this case kinetic rate for calcite rate equation is 9 orders of magnitude higher than the real value The initial average flow velocity is $4.6 \times 10^{-7}$ [m.s <sup>-1</sup> ] for this scenario.....                                                                          | 28 |

## List of Tables

|                                                                        |   |
|------------------------------------------------------------------------|---|
| Table S1. Concentrations used for the initial and inlet solutions..... | 4 |
|------------------------------------------------------------------------|---|

**Table S1. Concentrations used for the initial and inlet solutions**

| Solutions                  | pH    | Ca [mol.L <sup>-1</sup> ] | C [mol.L <sup>-1</sup> ] | Na[mol.L <sup>-1</sup> ] | Cl[mol.L <sup>-1</sup> ] |
|----------------------------|-------|---------------------------|--------------------------|--------------------------|--------------------------|
| Solution with<br>SI = 1.23 | 5.769 | 0.09306                   | 0.6036                   | 0.01                     | 0.01                     |
| Solution with<br>SI = 1.13 | 5.692 | 0.08953                   | 0.6644                   | 0.01                     | 0.01                     |

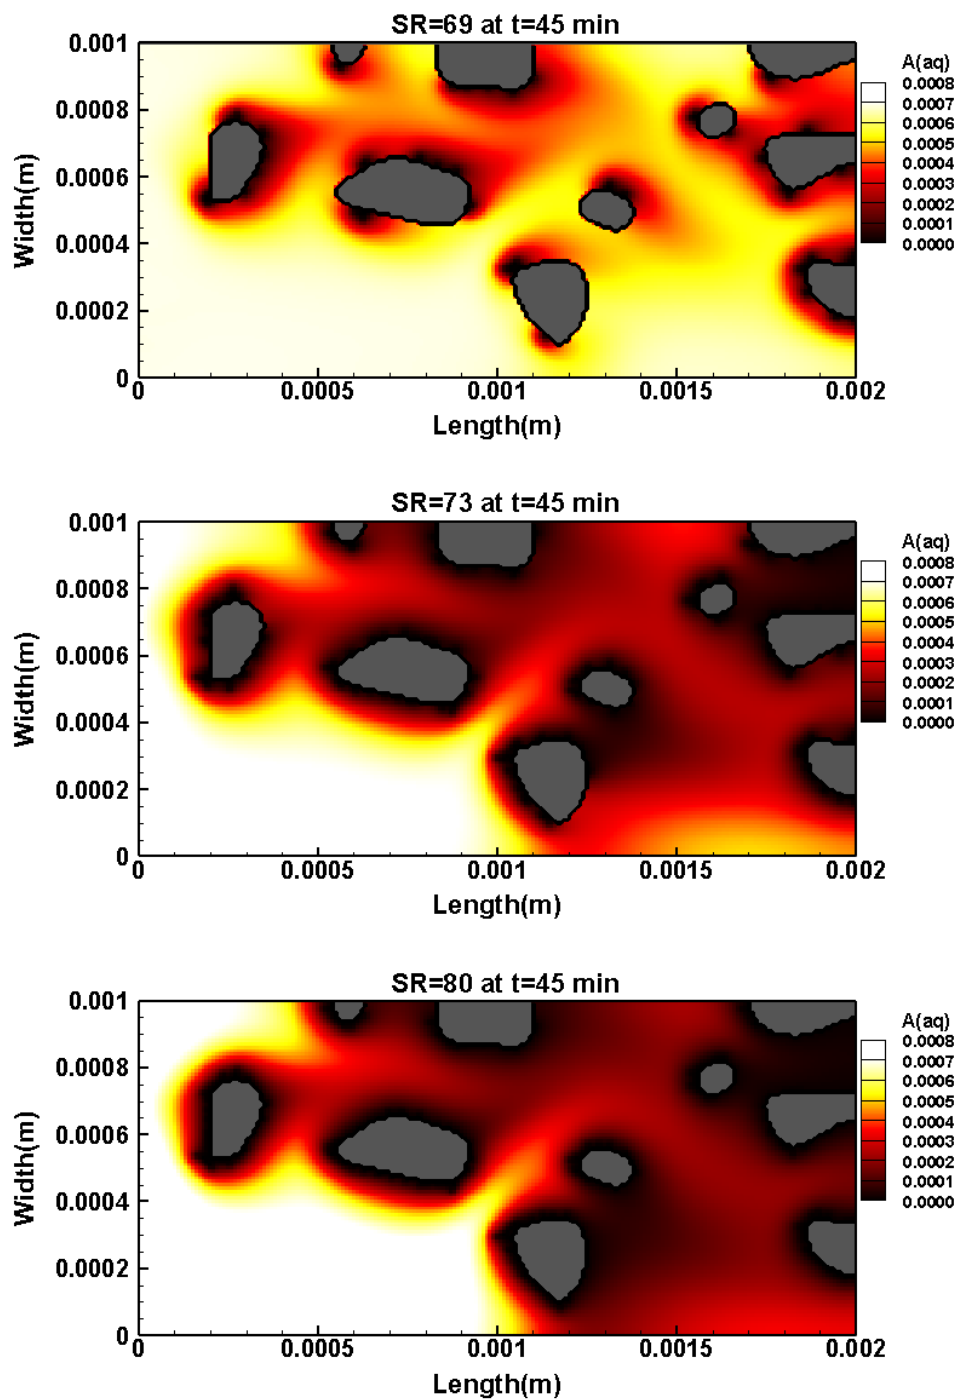

**Figure S1.** The concentration profile of  $A(aq)$  in  $\text{mol.L}^{-1}$  for  $\Omega = 69, 73,$  and  $80$  at  $t = 45$  minutes. The kinetic rate constant for this case is  $5 \times 10^{-5} [\text{mol.m}^{-2}.\text{s}^{-1}]$ . The initial average flow velocity is  $4.6 \times 10^{-7} [\text{m.s}^{-1}]$  for this scenario.

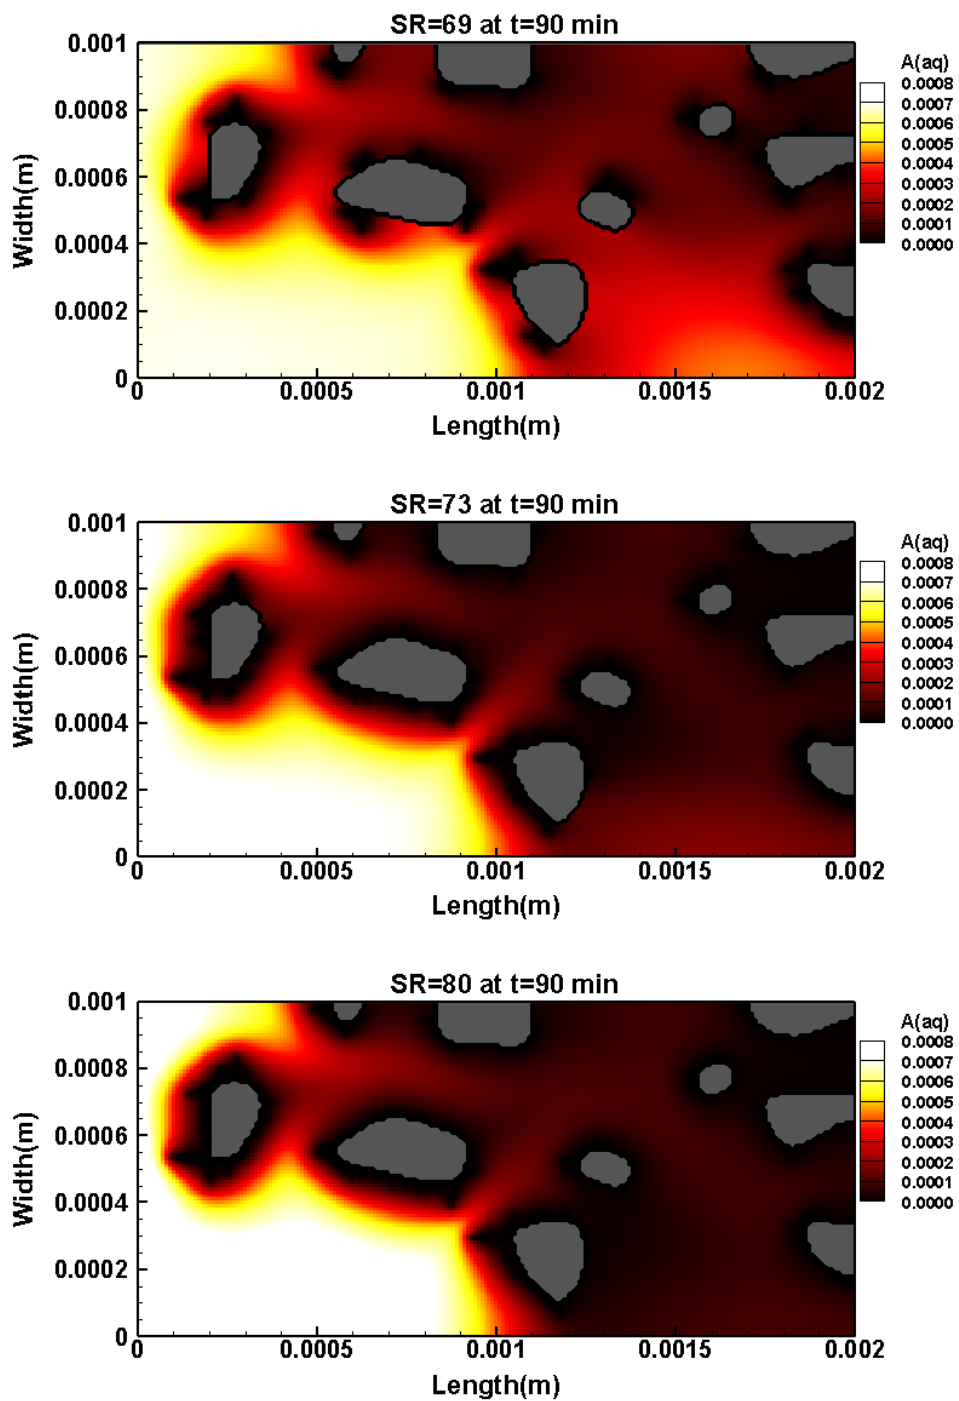

**Figure S2.** The concentration profile of A(aq) in mol.L<sup>-1</sup> for  $\Omega = 69$ , 73, and 80 at  $t = 90$  minutes. The kinetic rate constant for this case is  $5 \times 10^{-5}$  [mol.m<sup>-2</sup>.s<sup>-1</sup>]. The initial average flow velocity is  $4.6 \times 10^{-7}$  [m.s<sup>-1</sup>] for this scenario.

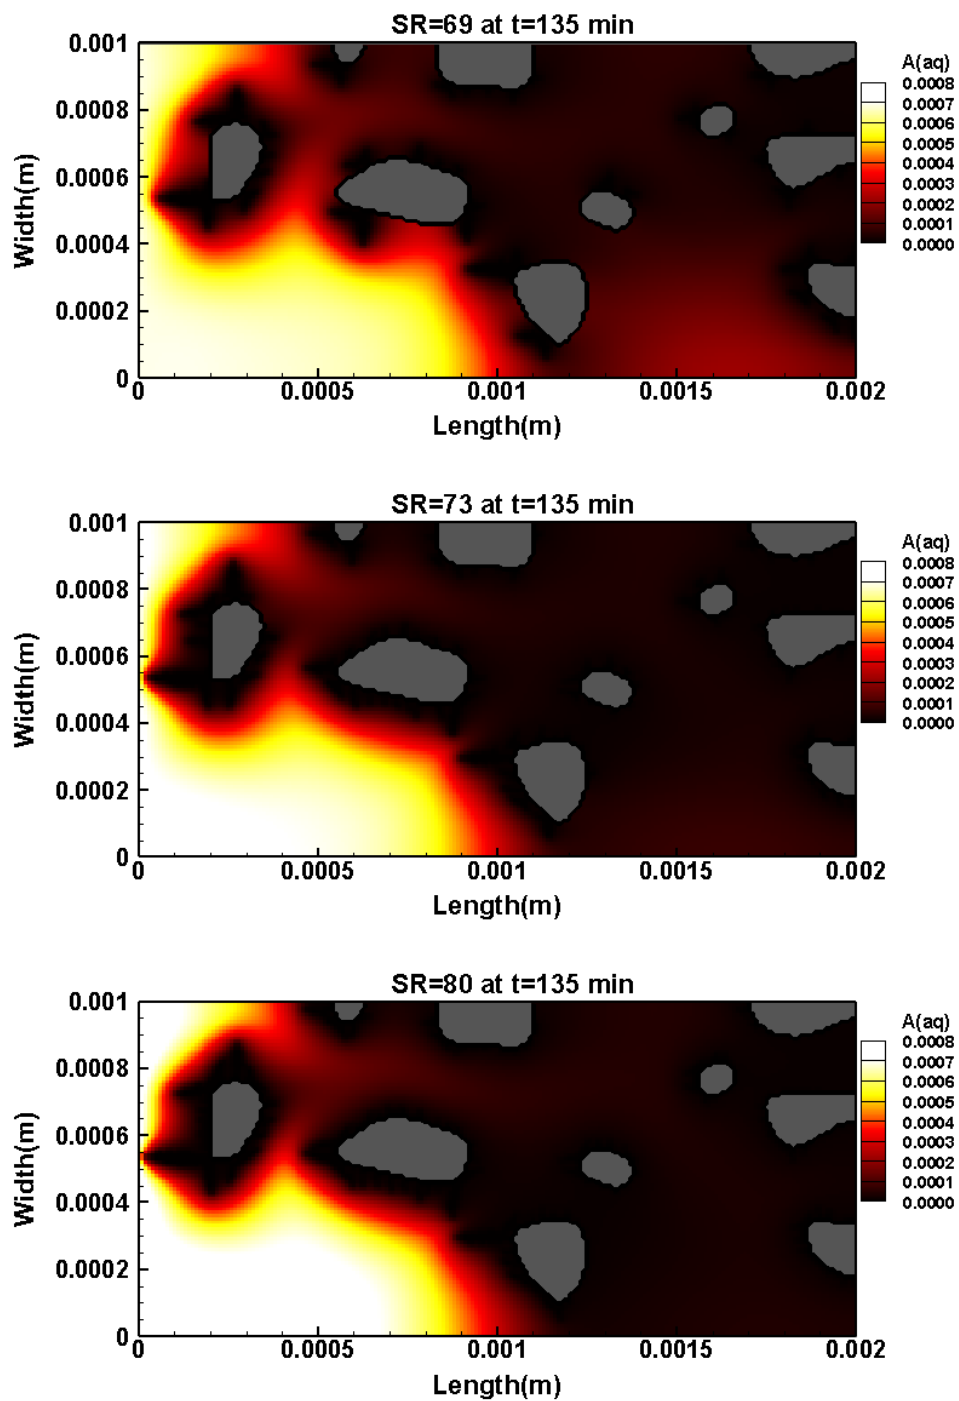

**Figure S3.** The concentration profile of  $A(aq)$  in  $\text{mol.L}^{-1}$  for  $\Omega = 69, 73,$  and  $80$  at  $t = 135$  minutes. The kinetic rate constant for this case is  $5 \times 10^{-5} [\text{mol.m}^{-2}.\text{s}^{-1}]$ . The initial average flow velocity is  $4.6 \times 10^{-7} [\text{m.s}^{-1}]$  for this scenario.

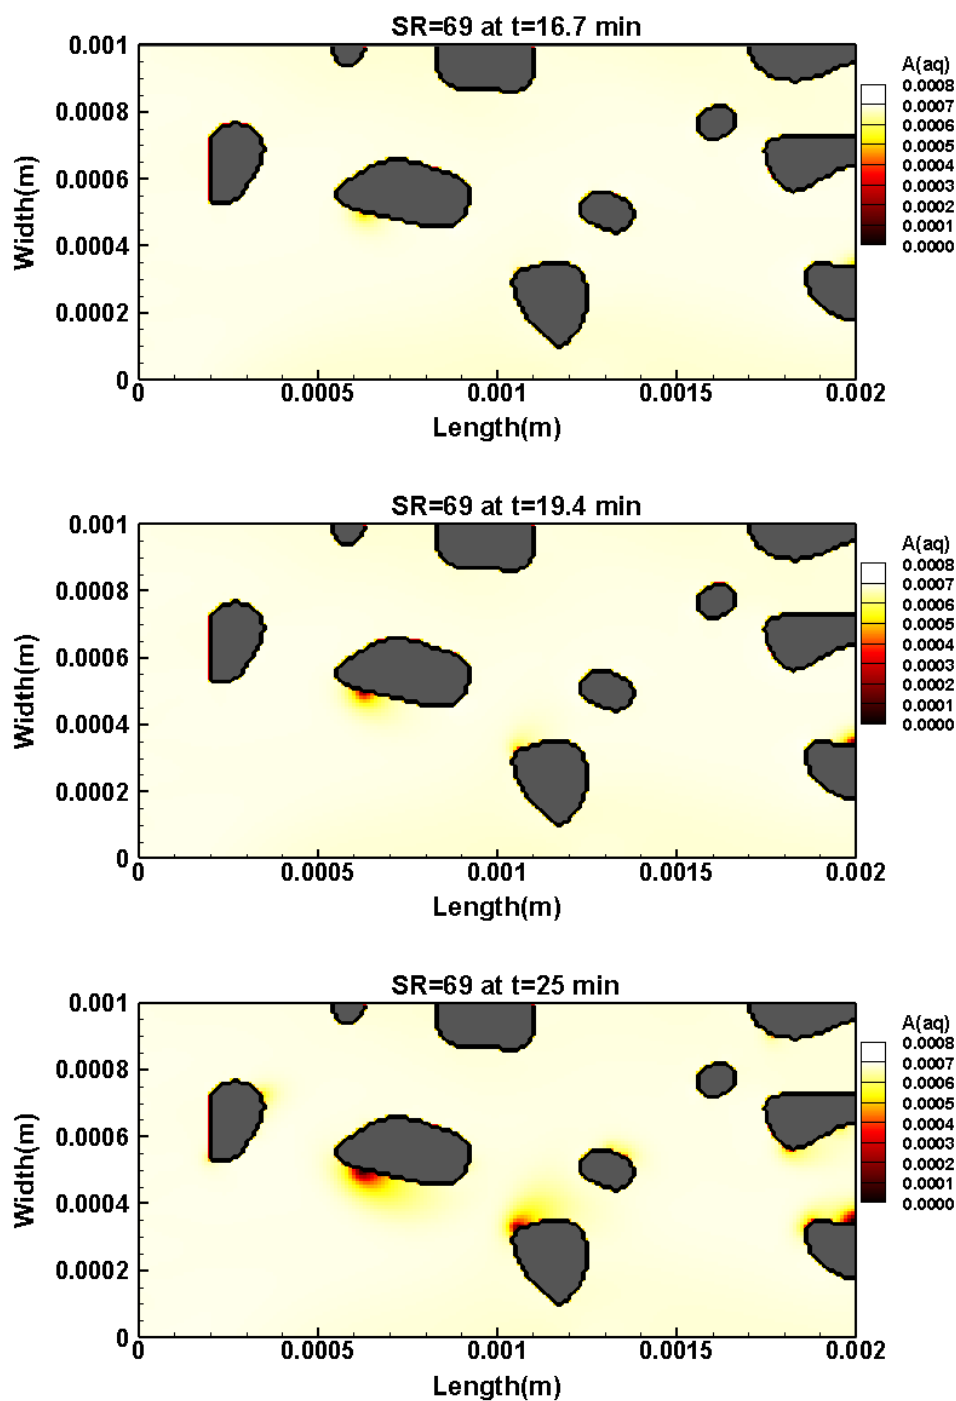

**Figure S4.** The temporal evolution of concentration profile of  $A(aq)$  in  $\text{mol.L}^{-1}$  for  $\Omega = 69$  at  $t = 16.7, 19.4$ , and  $25$  minutes. The kinetic rate constant for this case is  $5 \times 10^{-5} [\text{mol.m}^{-2}.\text{s}^{-1}]$ . The initial average flow velocity is  $4.6 \times 10^{-7} [\text{m.s}^{-1}]$  for this scenario.



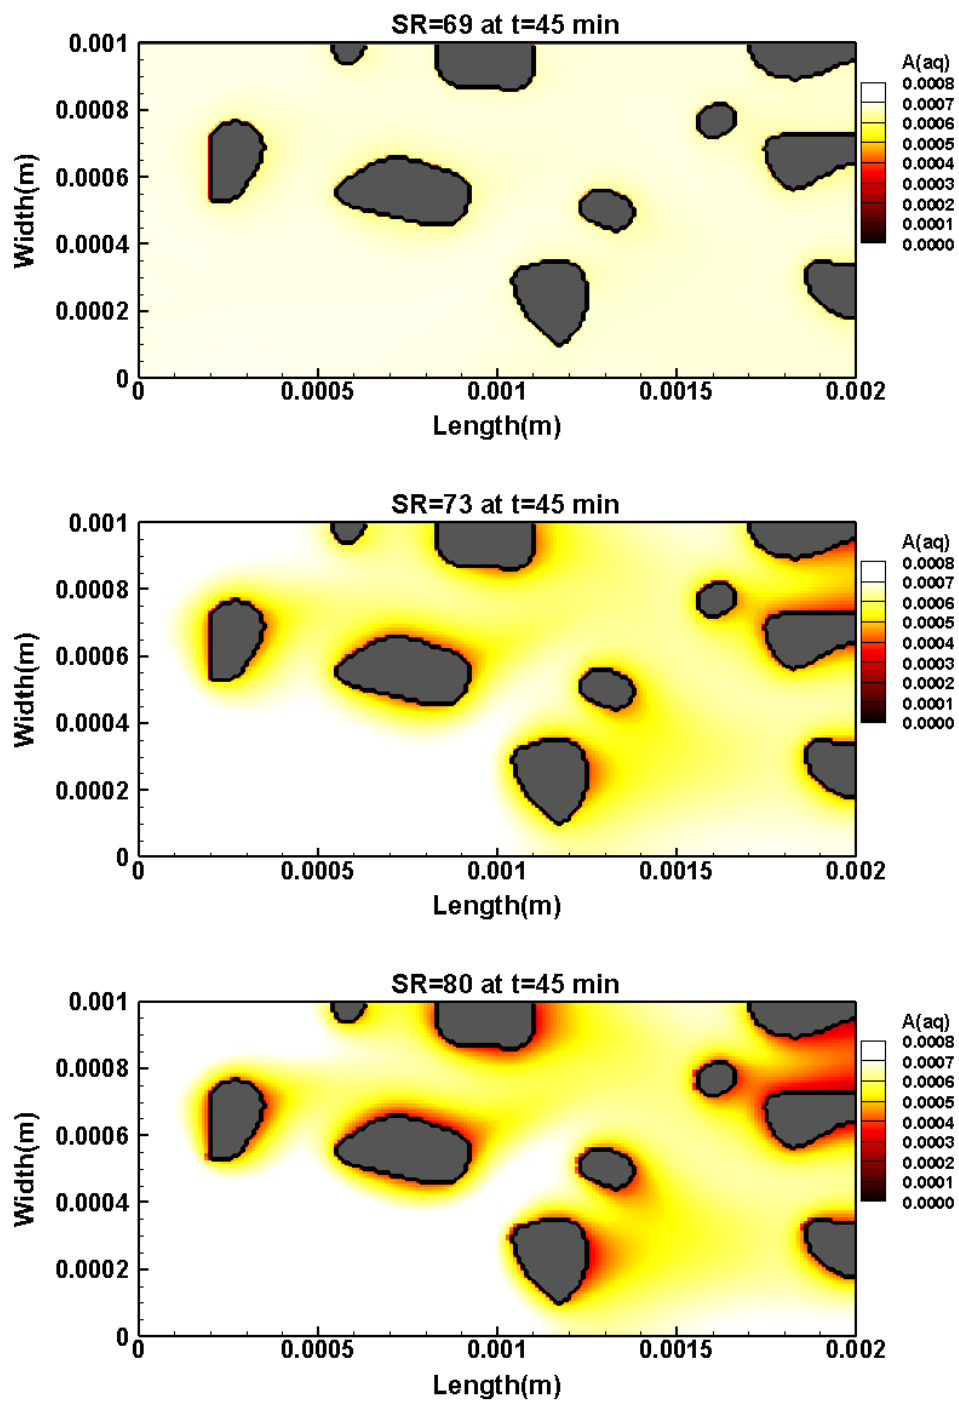

**Figure S5.** The concentration profile of  $A(aq)$  in  $\text{mol.L}^{-1}$  for  $\Omega = 69, 73,$  and  $80$  at  $t = 45$  minutes. The kinetic rate constant for this case is  $5 \times 10^{-6} [\text{mol.m}^{-2}.\text{s}^{-1}]$ . The initial average flow velocity is  $4.6 \times 10^{-7} [\text{m.s}^{-1}]$  for this scenario.

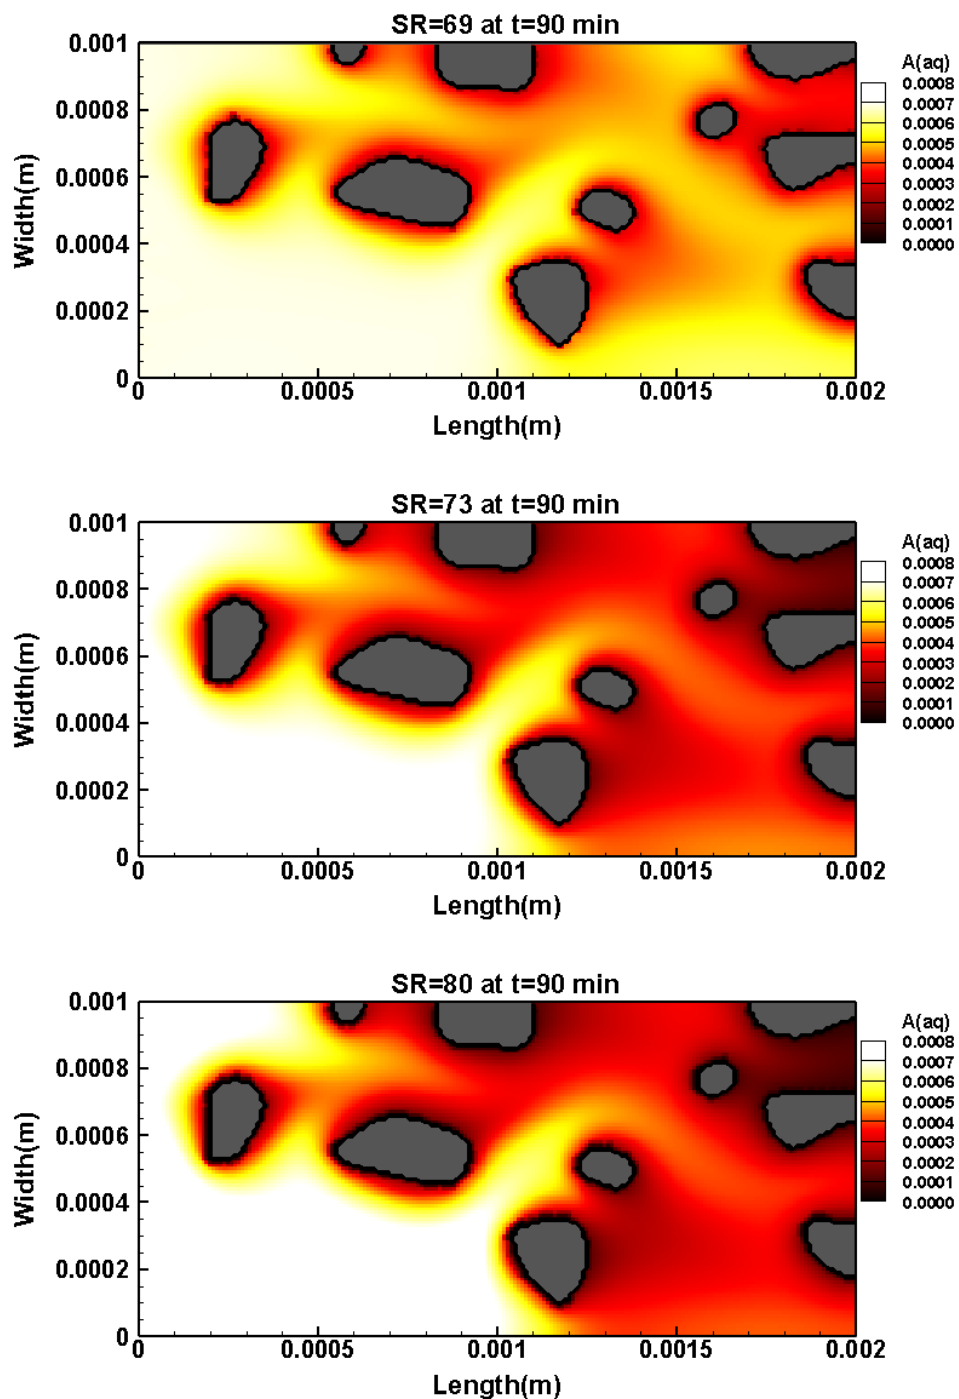

Figure S6. The concentration profile of A(aq) in mol.L<sup>-1</sup> for  $\Omega = 69$ , 73, and 80 at  $t = 90$  minutes. The kinetic rate constant for this case is  $5 \times 10^{-6}$  [mol.m<sup>-2</sup>.s<sup>-1</sup>]. The initial average flow velocity is  $4.6 \times 10^{-7}$  [m.s<sup>-1</sup>] for this scenario.

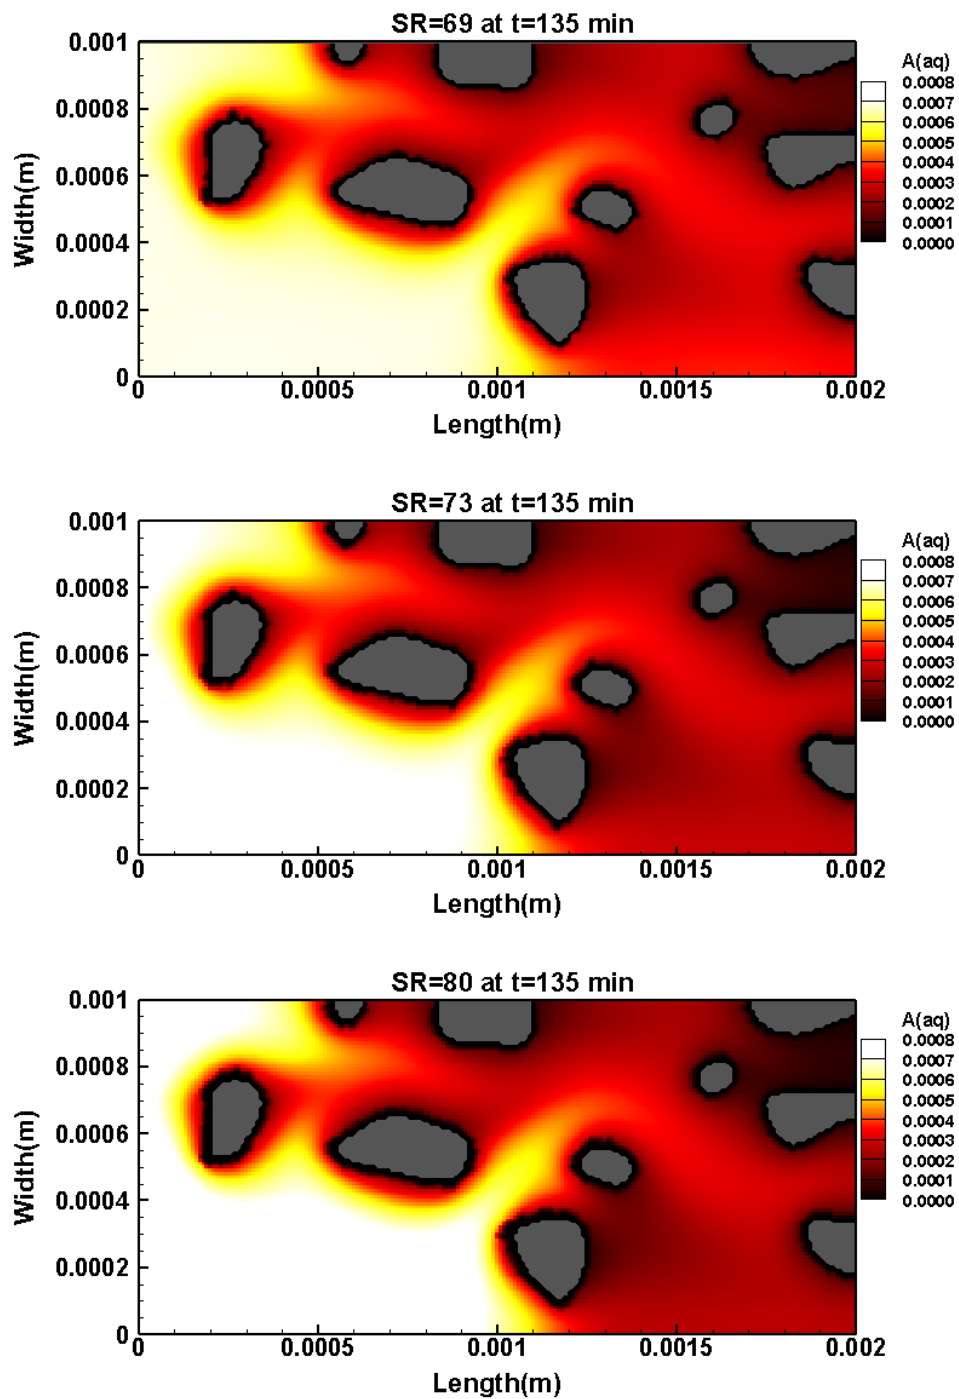

**Figure S7.** The concentration profile of A(aq) in mol.L<sup>-1</sup> for  $\Omega = 69$ , 73, and 80 at  $t = 135$  minutes. The kinetic rate constant for this case is  $5 \times 10^{-6} [\text{mol.m}^{-2}.\text{s}^{-1}]$ . The initial average flow velocity is  $4.6 \times 10^{-7} [\text{m.s}^{-1}]$  for this scenario.

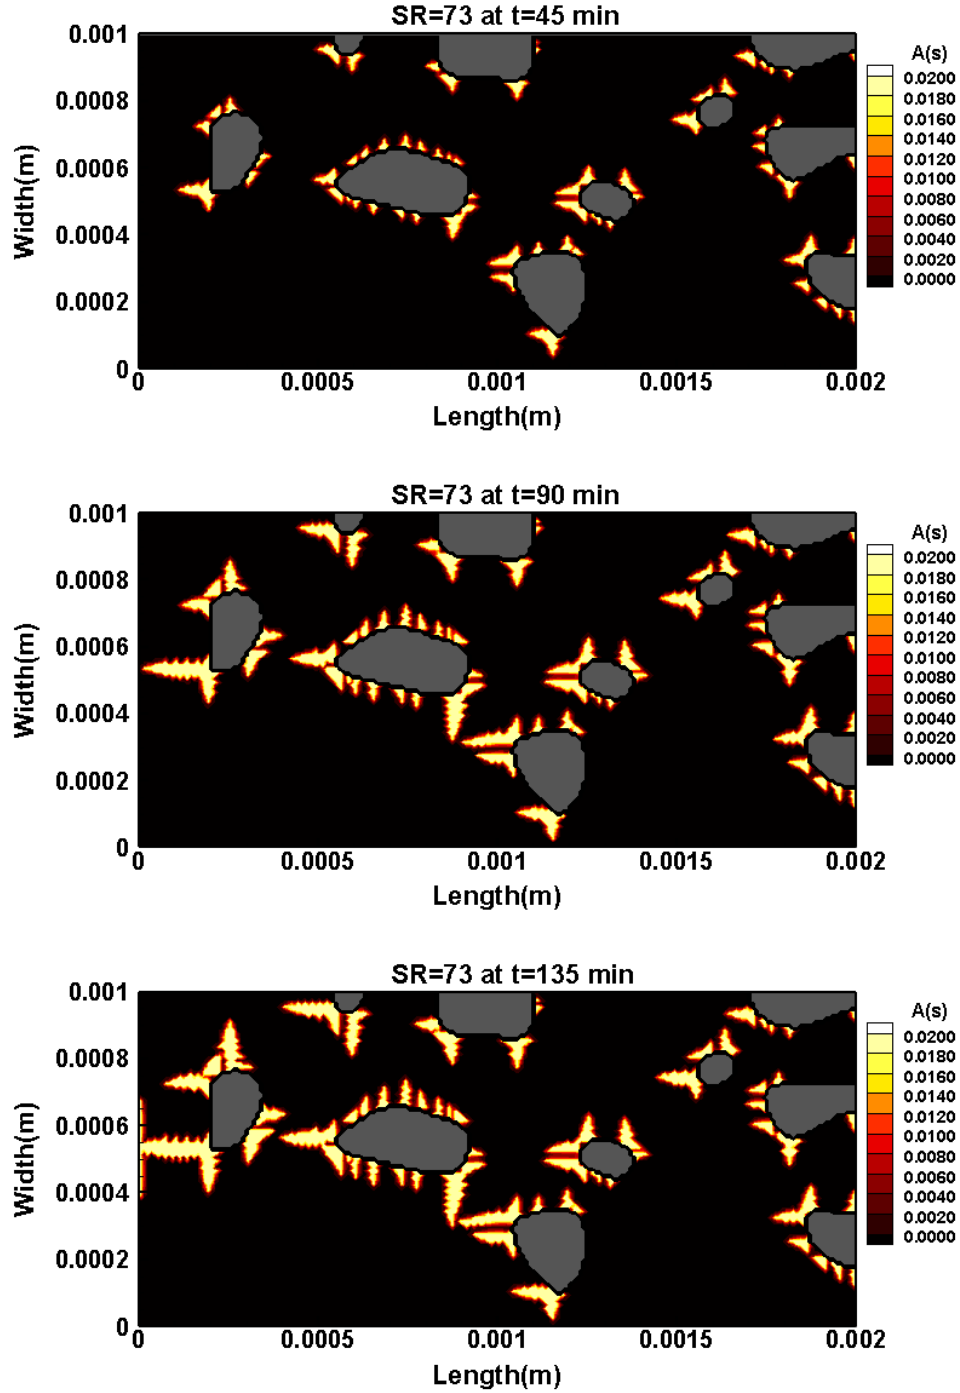

Figure S8. Temporal evolution of the amount of precipitated mineral in  $\text{mol.L}^{-1}$  for  $\Omega = 73$  at  $t = 45, 90$ , and  $135$  minutes. The kinetic rate constant for this case is  $5 \times 10^{-5} [\text{mol.m}^{-2}.\text{s}^{-1}]$ . The initial average flow velocity is  $2.3 \times 10^{-6} [\text{m.s}^{-1}]$  for this scenario.

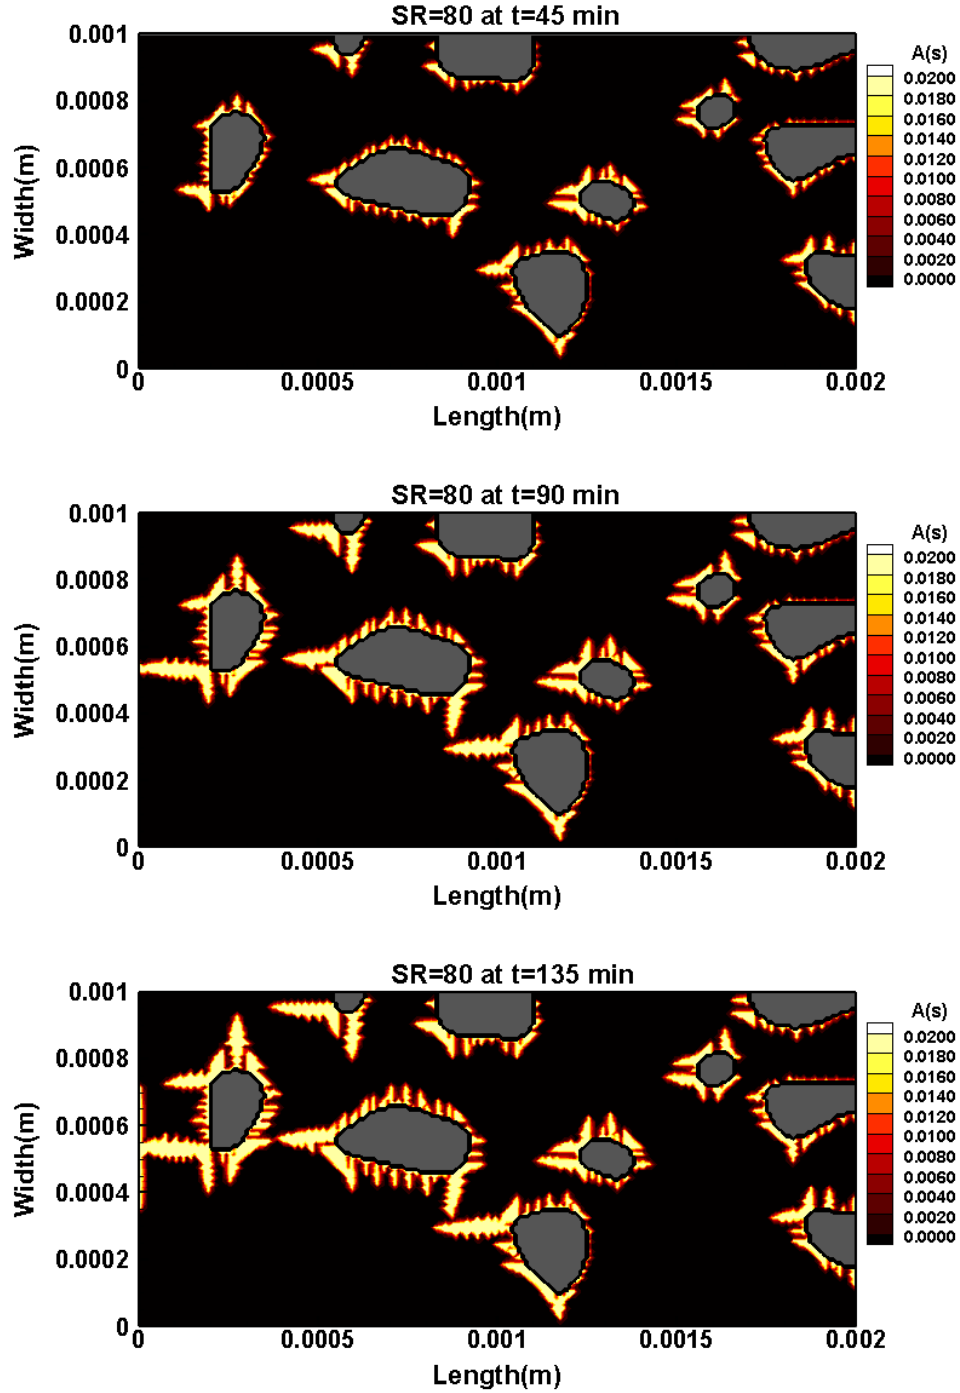

Figure S9. Temporal evolution of the amount of precipitated mineral in  $\text{mol.L}^{-1}$  for  $\Omega = 80$  at  $t = 45, 90$ , and  $135$  minutes. The kinetic rate constant for this case is  $5 \times 10^{-5} [\text{mol.m}^{-2}.\text{s}^{-1}]$ . The initial average flow velocity is  $2.3 \times 10^{-6} [\text{m.s}^{-1}]$  for this scenario.

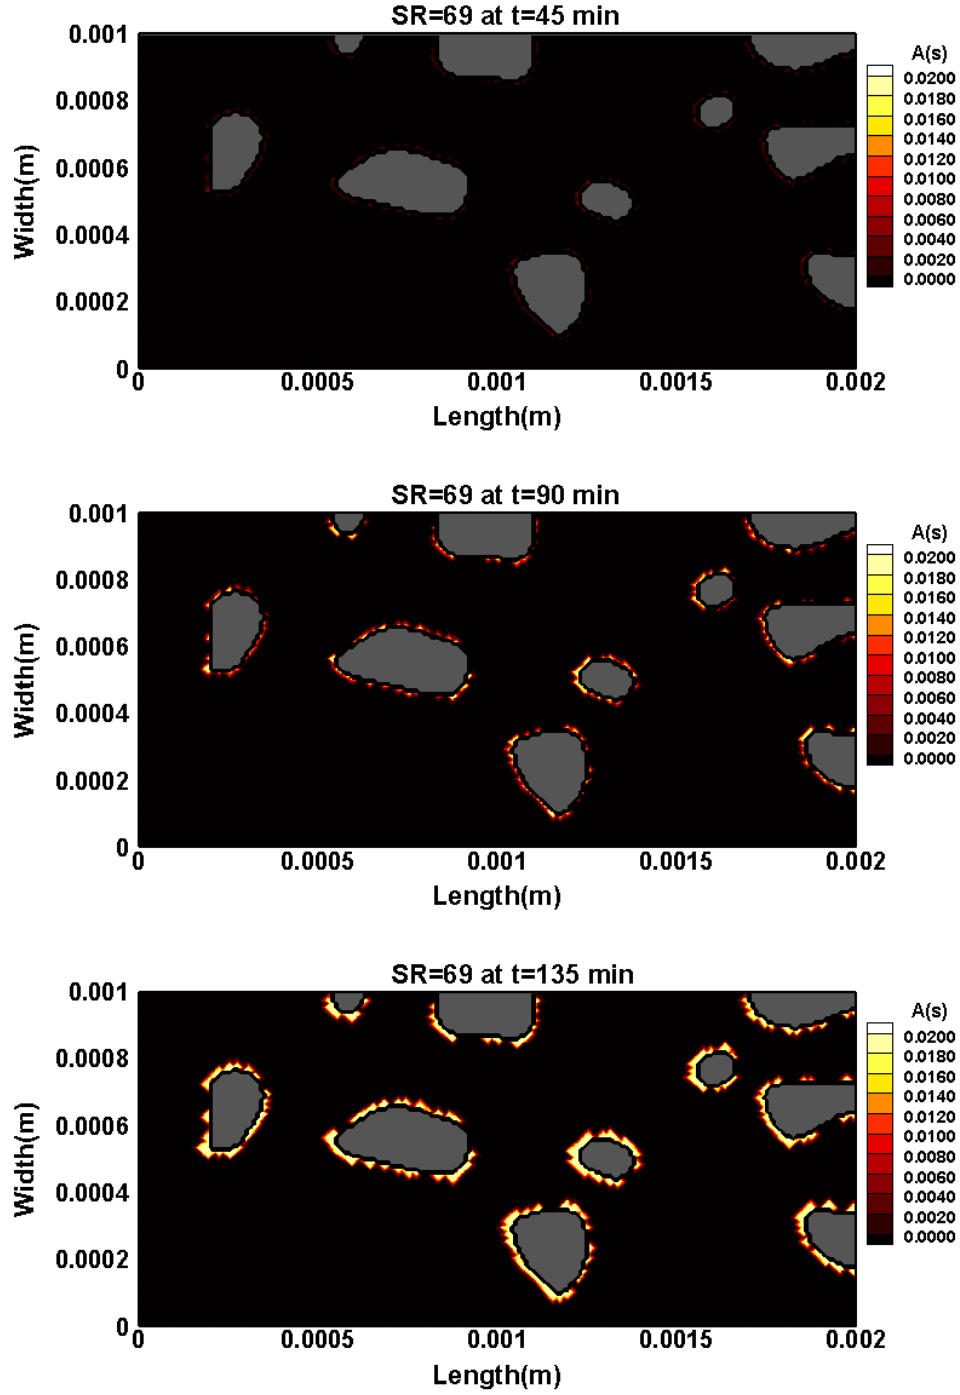

**Figure S10.** Temporal evolution of the amount of precipitated mineral in  $\text{mol.L}^{-1}$  for  $\Omega = 69$  at  $t = 45, 90$ , and  $135$  minutes. The kinetic rate constant for this case is  $5 \times 10^{-6} [\text{mol.m}^{-2}.\text{s}^{-1}]$ . The initial average flow velocity is  $2.3 \times 10^{-6} [\text{m.s}^{-1}]$  for this scenario.

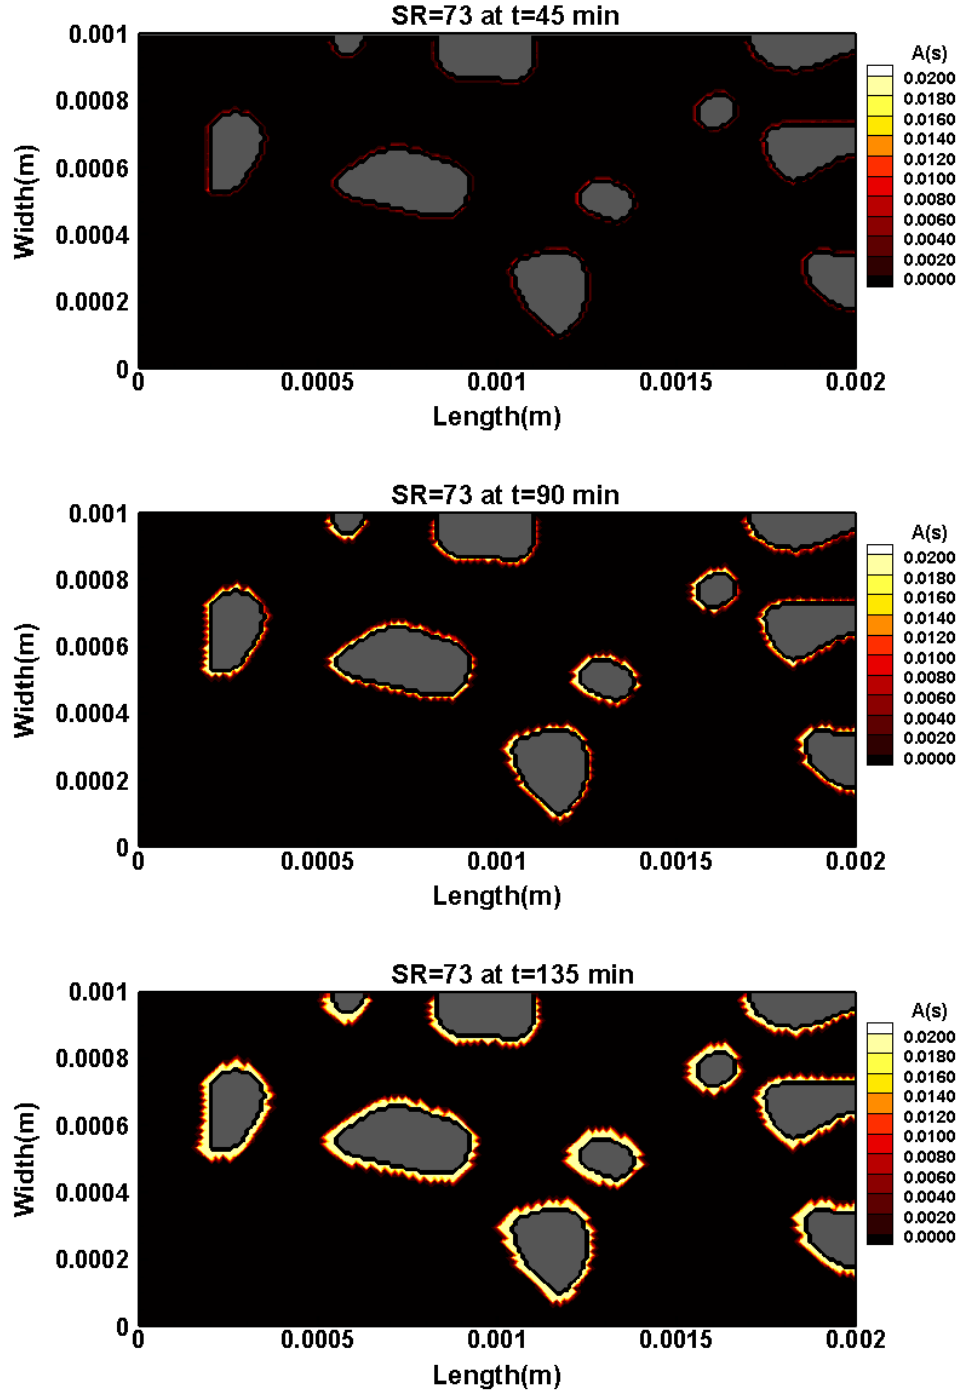

**Figure S11.** Temporal evolution of the amount of precipitated mineral in  $\text{mol.L}^{-1}$  for  $\Omega = 73$  at  $t = 45, 90$ , and  $135$  minutes. The kinetic rate constant for this case is  $5 \times 10^{-6} [\text{mol.m}^{-2}.\text{s}^{-1}]$ . The initial average flow velocity is  $2.3 \times 10^{-6} [\text{m.s}^{-1}]$  for this scenario.

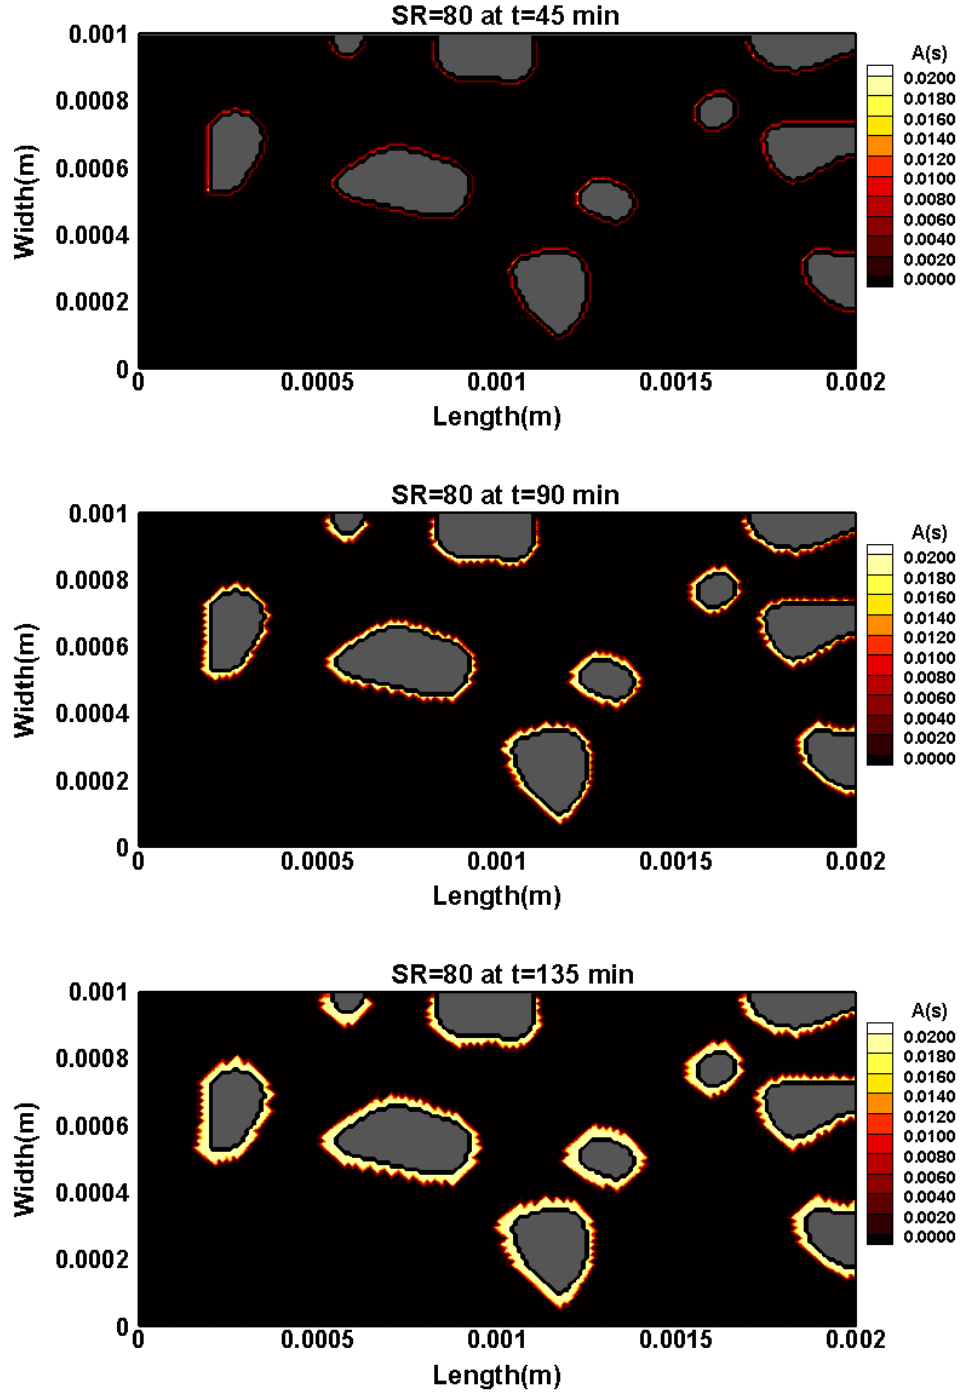

**Figure S12.** Temporal evolution of the amount of precipitated mineral in  $\text{mol.L}^{-1}$  for  $\Omega = 80$  at  $t = 45, 90$ , and  $135$  minutes. The kinetic rate constant for this case is  $5 \times 10^{-6} [\text{mol.m}^{-2}.\text{s}^{-1}]$ . The initial average flow velocity is  $2.3 \times 10^{-6} [\text{m.s}^{-1}]$  for this scenario.



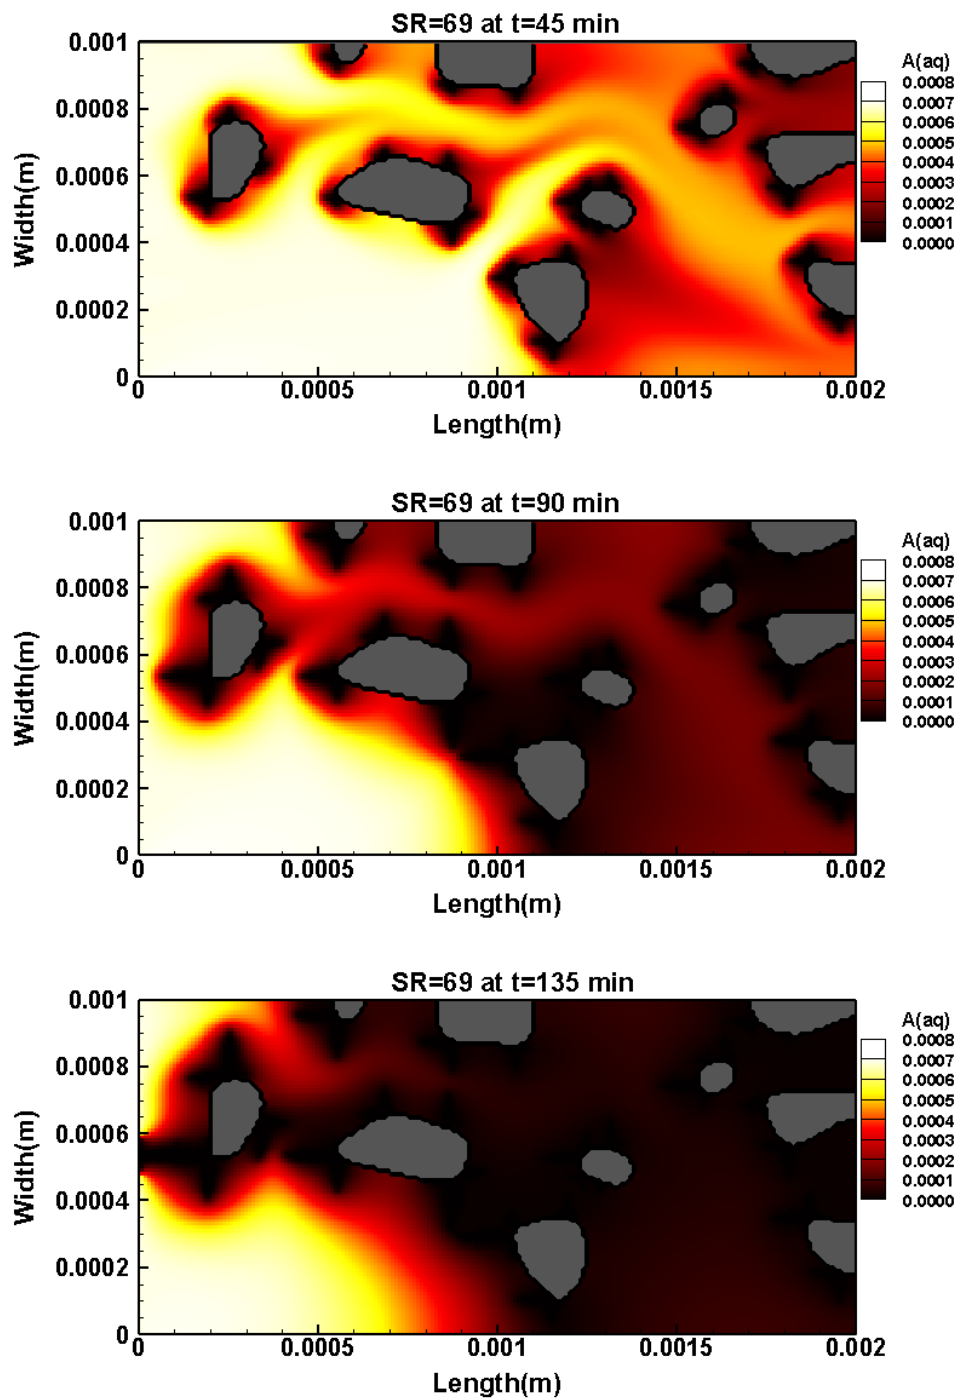

Figure S13. The temporal evolution of concentration profile of  $A(aq)$  in  $\text{mol.L}^{-1}$  for  $\Omega = 69$  at  $t = 45, 90,$  and  $135$  minutes. The kinetic rate constant for this case is  $5 \times 10^{-5} [\text{mol.m}^{-2}.\text{s}^{-1}]$ . The initial average flow velocity is  $2.3 \times 10^{-6} [\text{m.s}^{-1}]$  for this scenario.

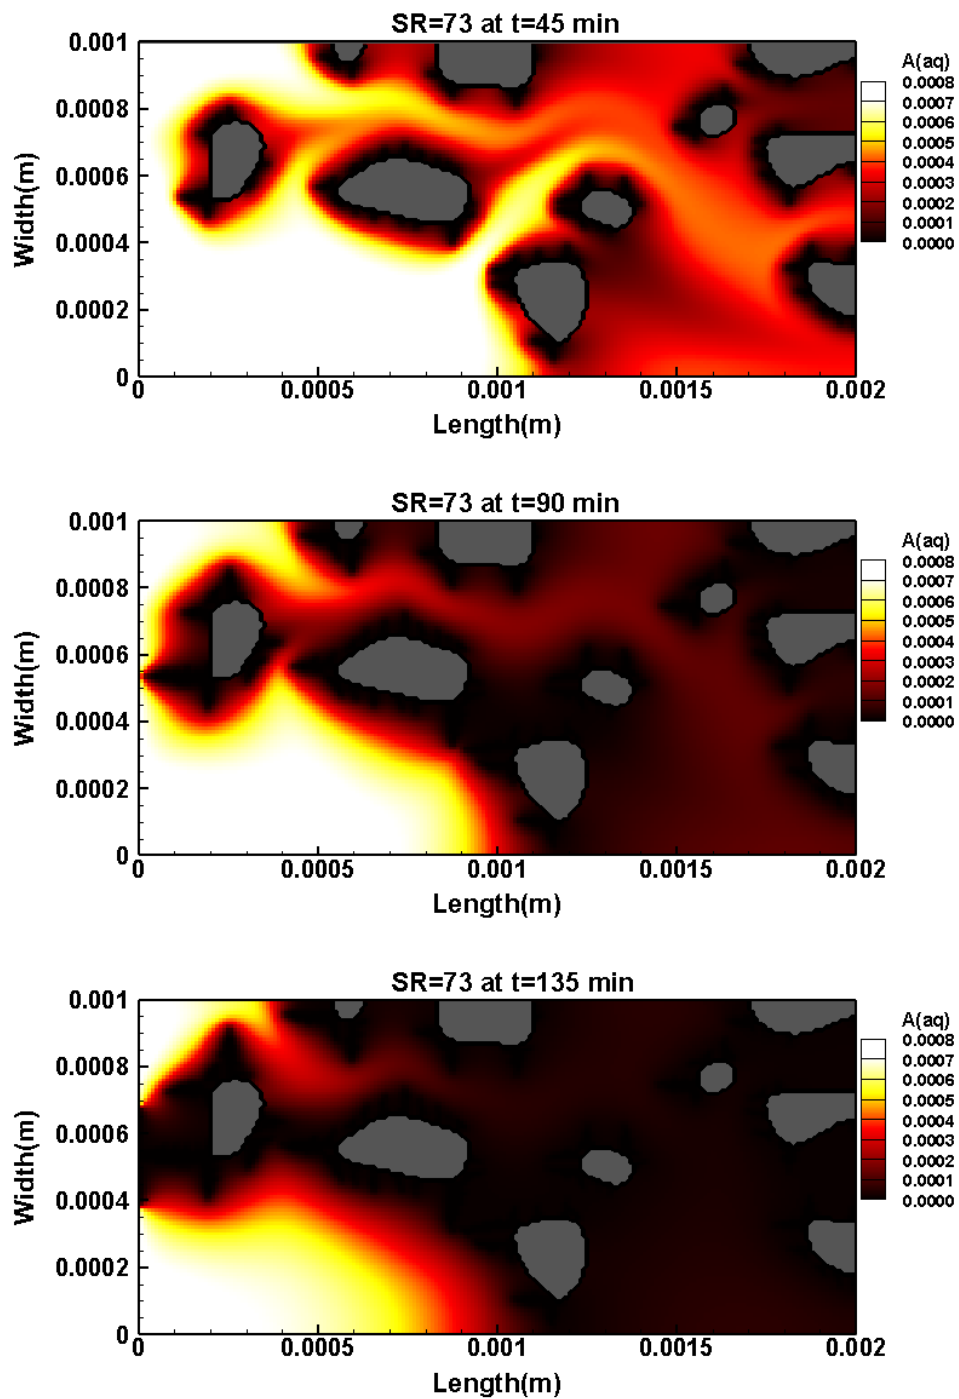

Figure S14. The temporal evolution of concentration profile of  $A(aq)$  in  $\text{mol.L}^{-1}$  for  $\Omega = 73$  at  $t = 45, 90$ , and  $135$  minutes. The kinetic rate constant for this case is  $5 \times 10^{-5} [\text{mol.m}^{-2}.\text{s}^{-1}]$ . The initial average flow velocity is  $2.3 \times 10^{-6} [\text{m.s}^{-1}]$  for this scenario.

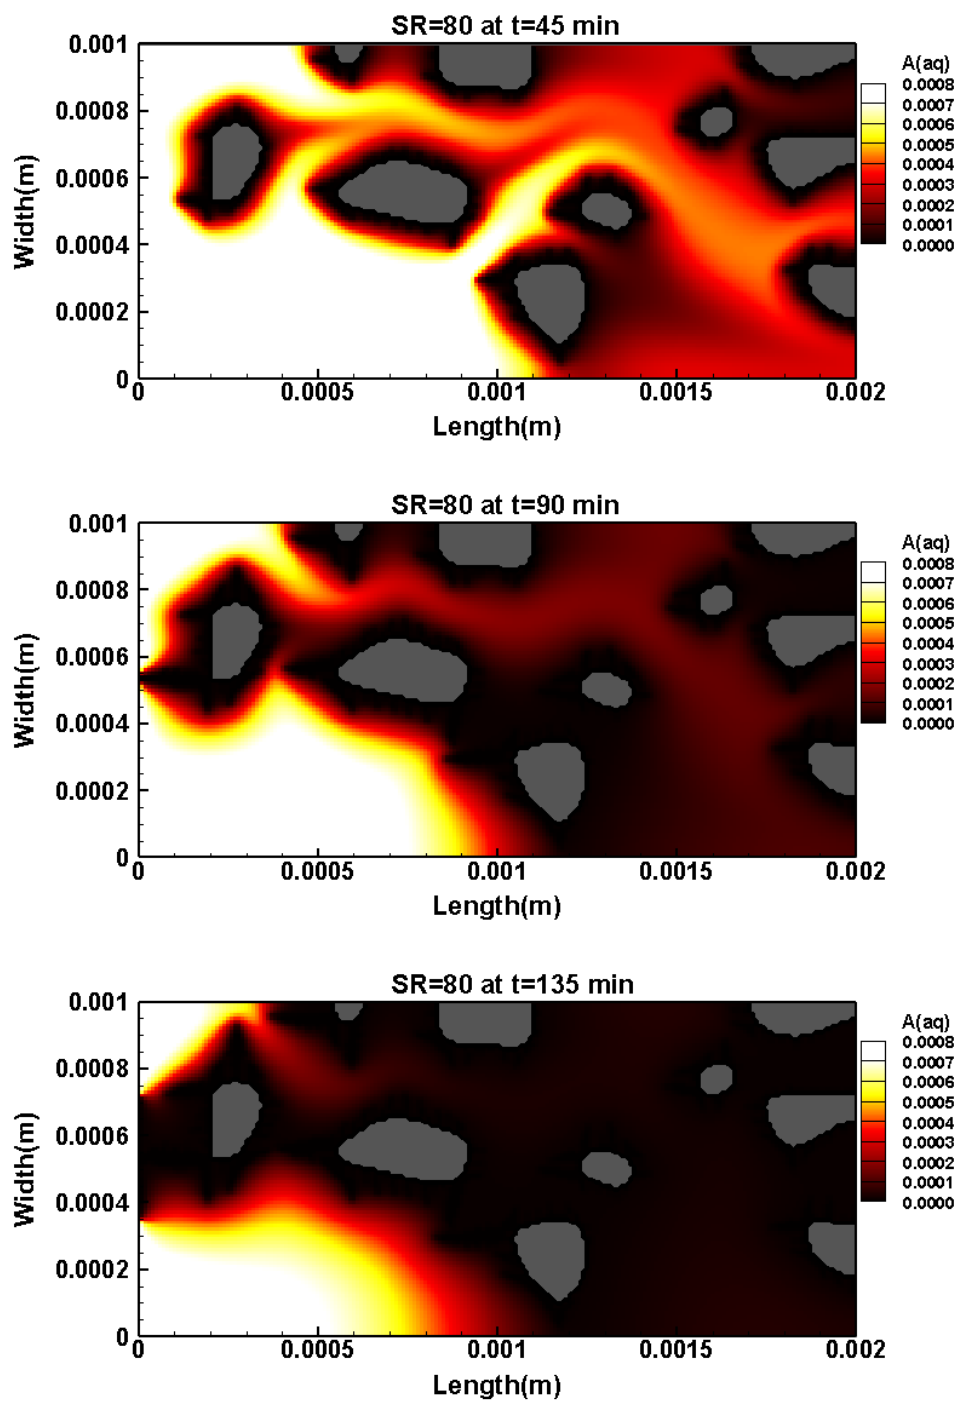

Figure S15. The temporal evolution of concentration profile of  $A(aq)$  in  $\text{mol.L}^{-1}$  for  $\Omega = 80$  at  $t = 45, 90,$  and  $135$  minutes. The kinetic rate constant for this case is  $5 \times 10^{-5} [\text{mol.m}^{-2}.\text{s}^{-1}]$ . The initial average flow velocity is  $2.3 \times 10^{-6} [\text{m.s}^{-1}]$  for this scenario.

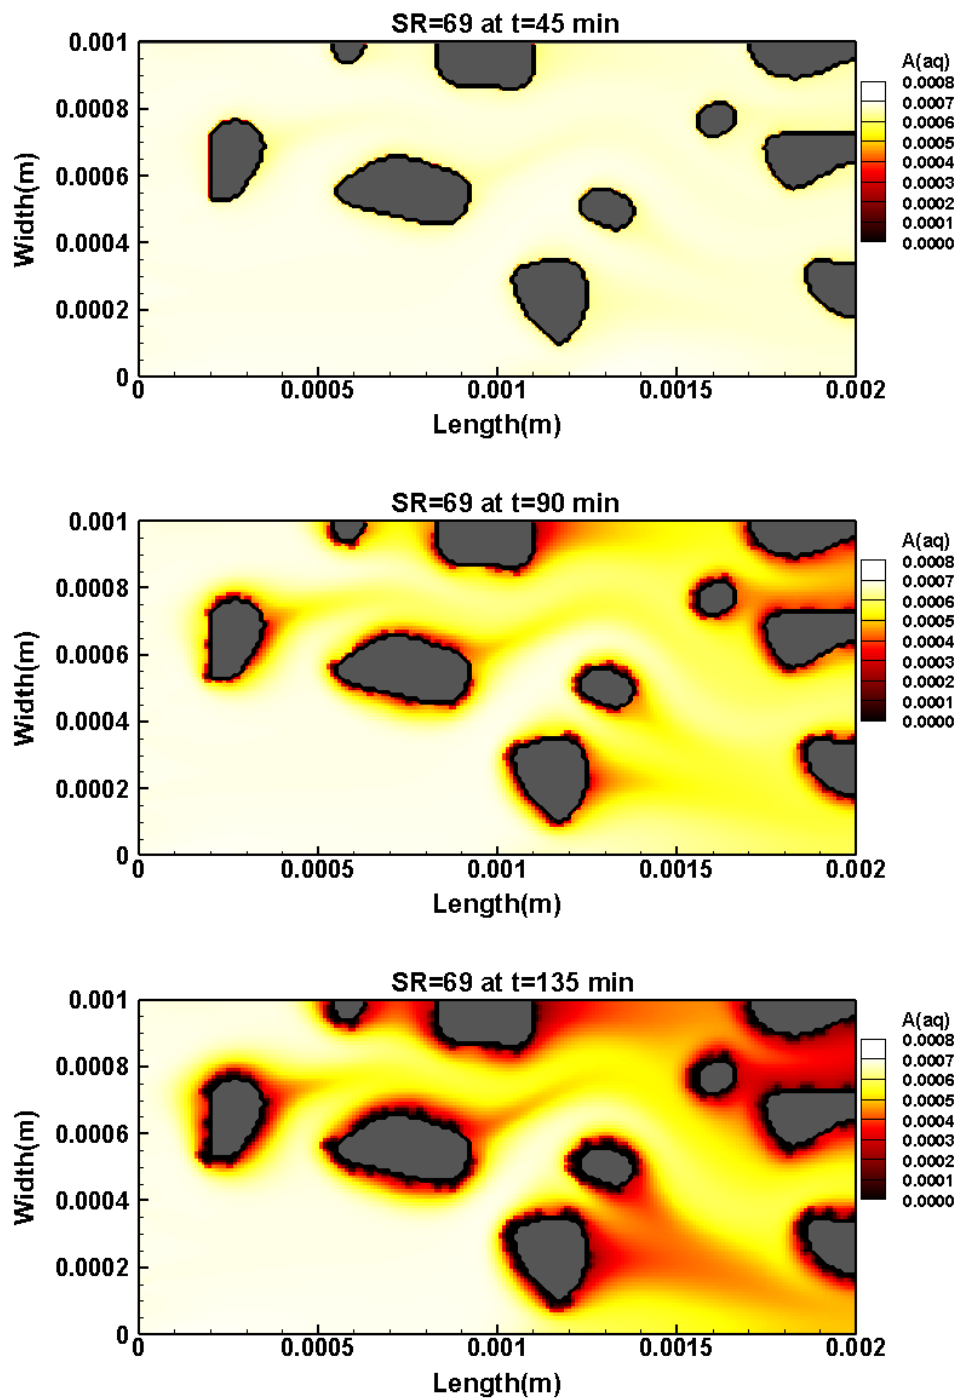

Figure S16. The temporal evolution of concentration profile of  $A(aq)$  in  $\text{mol.L}^{-1}$  for  $\Omega = 69$  at  $t = 45, 90$ , and  $135$  minutes. The kinetic rate constant for this case is  $5 \times 10^{-6} [\text{mol.m}^{-2}.\text{s}^{-1}]$ . The initial average flow velocity is  $2.3 \times 10^{-6} [\text{m.s}^{-1}]$  for this scenario.

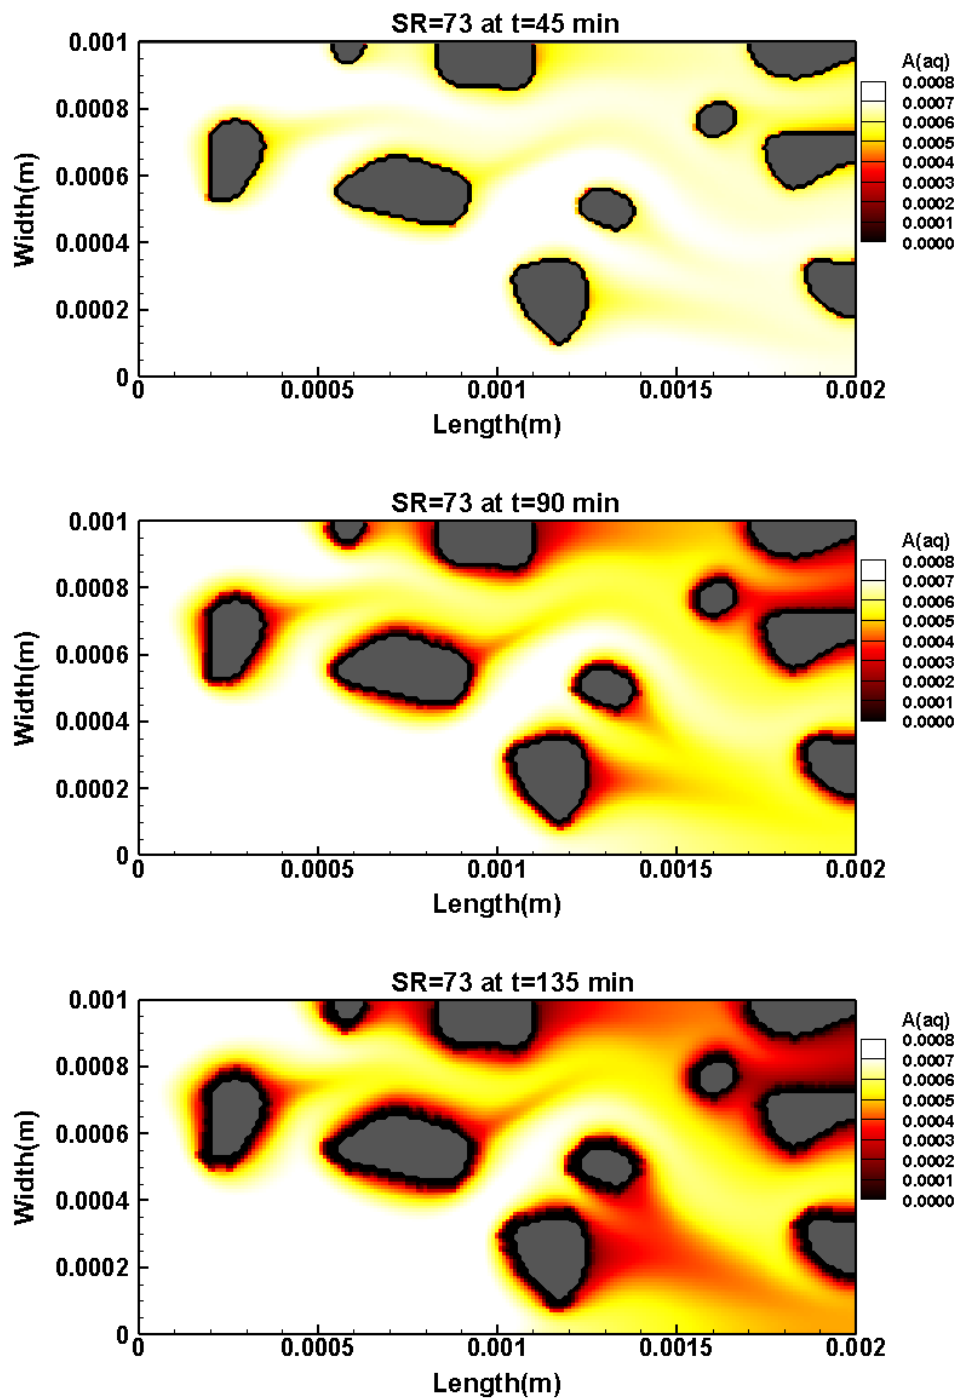

**Figure S17.** The temporal evolution of concentration profile of  $A(aq)$  in  $\text{mol.L}^{-1}$  for  $\Omega = 73$  at  $t = 45, 90,$  and  $135$  minutes. The kinetic rate constant for this case is  $5 \times 10^{-6} [\text{mol.m}^{-2}.\text{s}^{-1}]$ . The initial average flow velocity is  $2.3 \times 10^{-6} [\text{m.s}^{-1}]$  for this scenario.

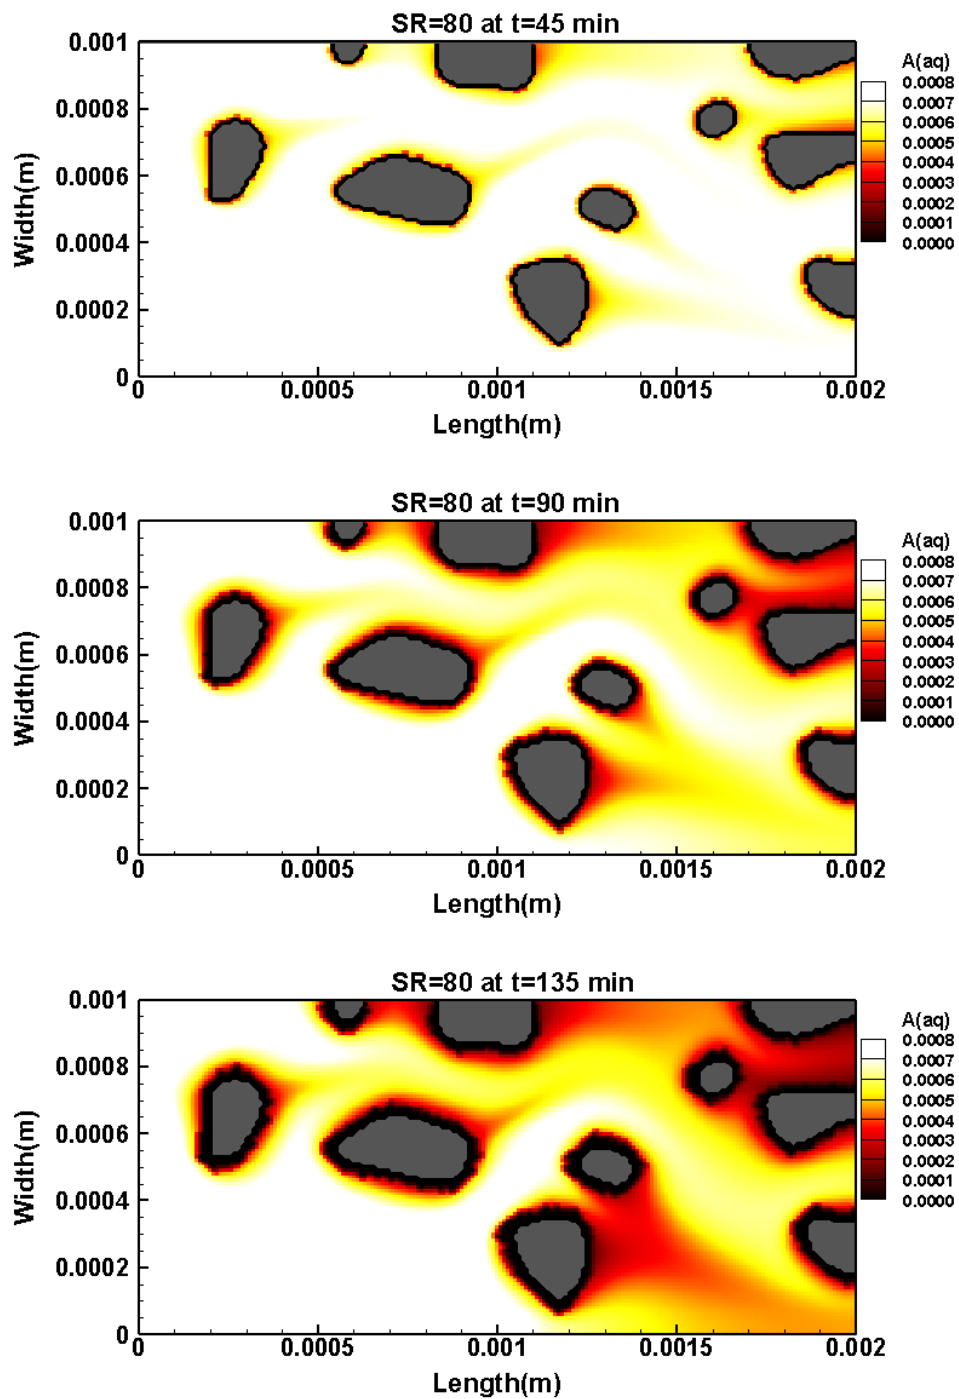

Figure S18. The temporal evolution of concentration profile of  $A(aq)$  in  $\text{mol.L}^{-1}$  for  $\Omega = 80$  at  $t = 45, 90$ , and  $135$  minutes. The kinetic rate constant for this case is  $5 \times 10^{-6} [\text{mol.m}^{-2}.\text{s}^{-1}]$ . The initial average flow velocity is  $2.3 \times 10^{-6} [\text{m.s}^{-1}]$  for this scenario.

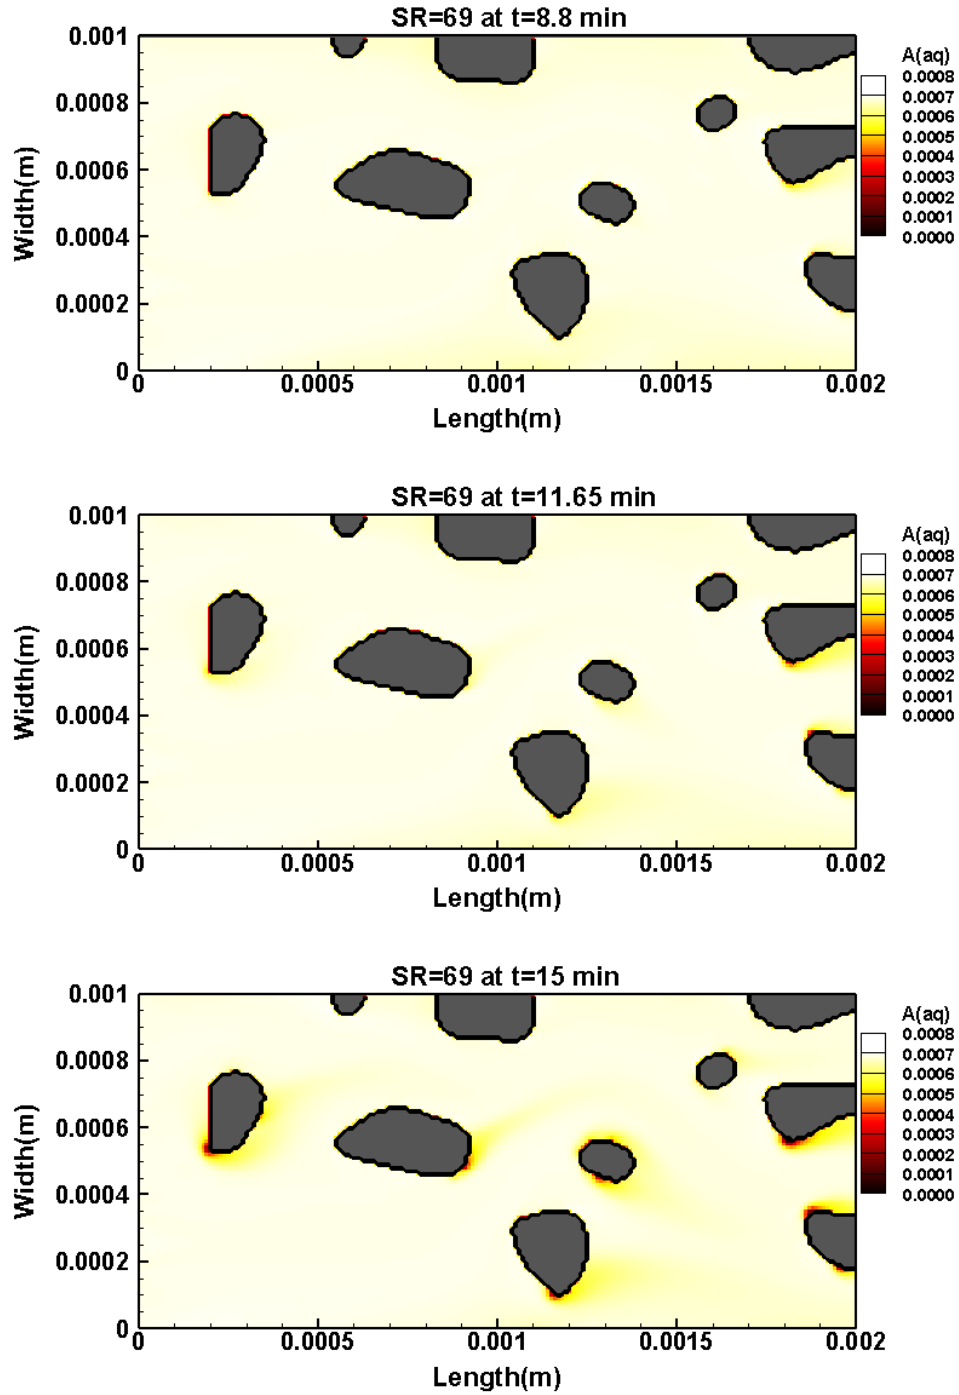

**Figure S19.** The temporal evolution of concentration profile of  $A(aq)$  in  $\text{mol.L}^{-1}$  for  $\Omega = 69$  at  $t = 8.8, 11.65$ , and  $15$  minutes. The kinetic rate constant for this case is  $5 \times 10^{-5} [\text{mol.m}^{-2}.\text{s}^{-1}]$ . The initial average flow velocity is  $2.3 \times 10^{-6} [\text{m.s}^{-1}]$  for this scenario.

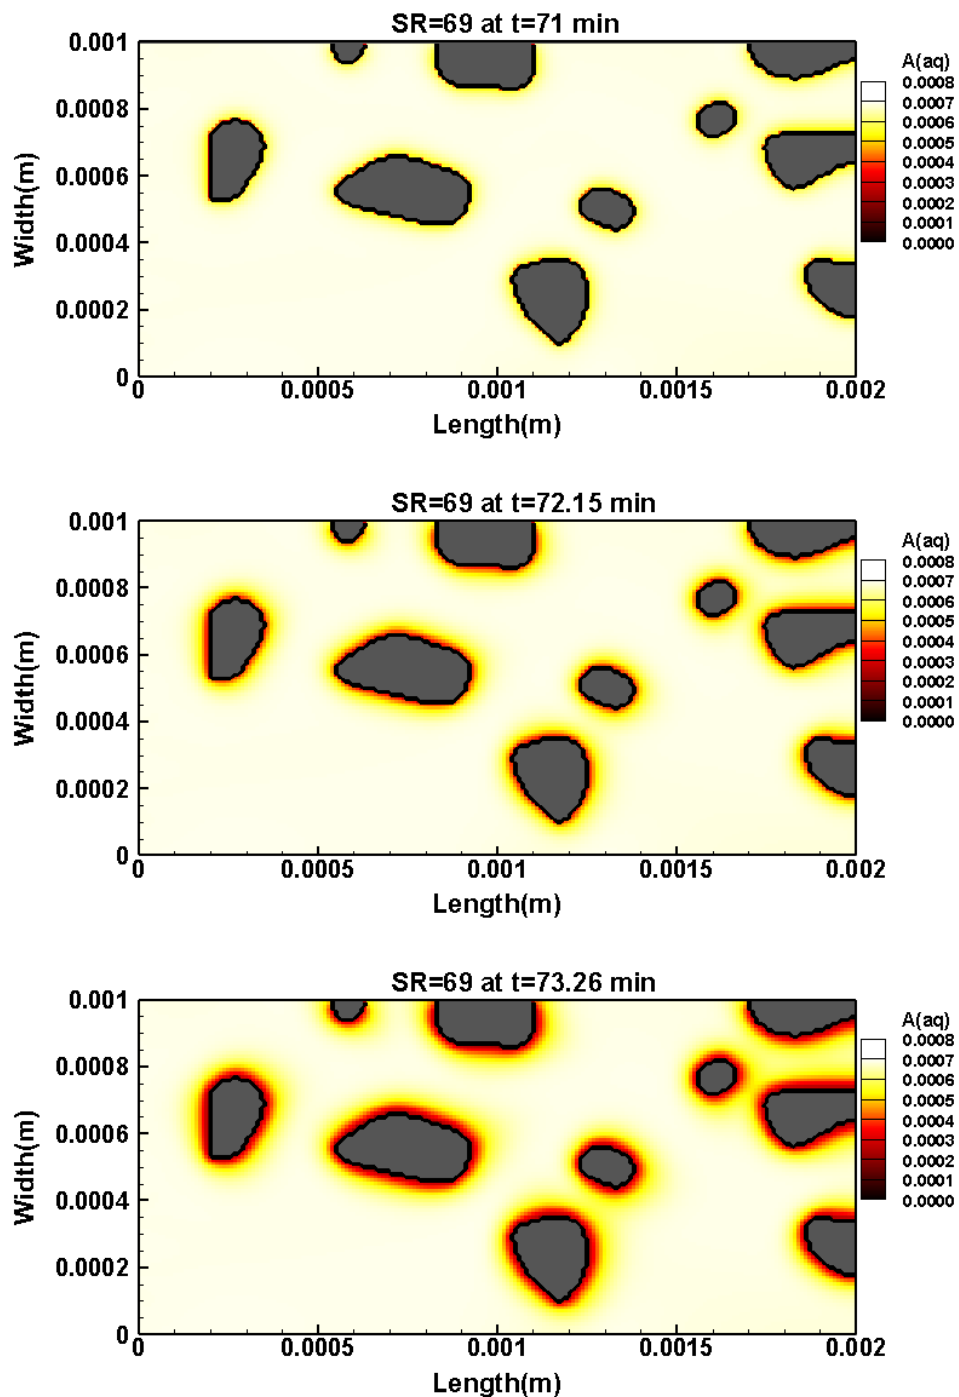

Figure S20. The temporal evolution of concentration profile of  $A(aq)$  in  $\text{mol.L}^{-1}$  for  $\Omega = 69$  at  $t = 71$ ,  $72.15$ , and  $73.26$  minutes where deterministic approach is used for the nucleation calculations. The kinetic rate constant for this case is  $5 \times 10^{-5} [\text{mol.m}^{-2}.\text{s}^{-1}]$ . The initial average flow velocity is  $4.6 \times 10^{-7} [\text{m.s}^{-1}]$  for this scenario.



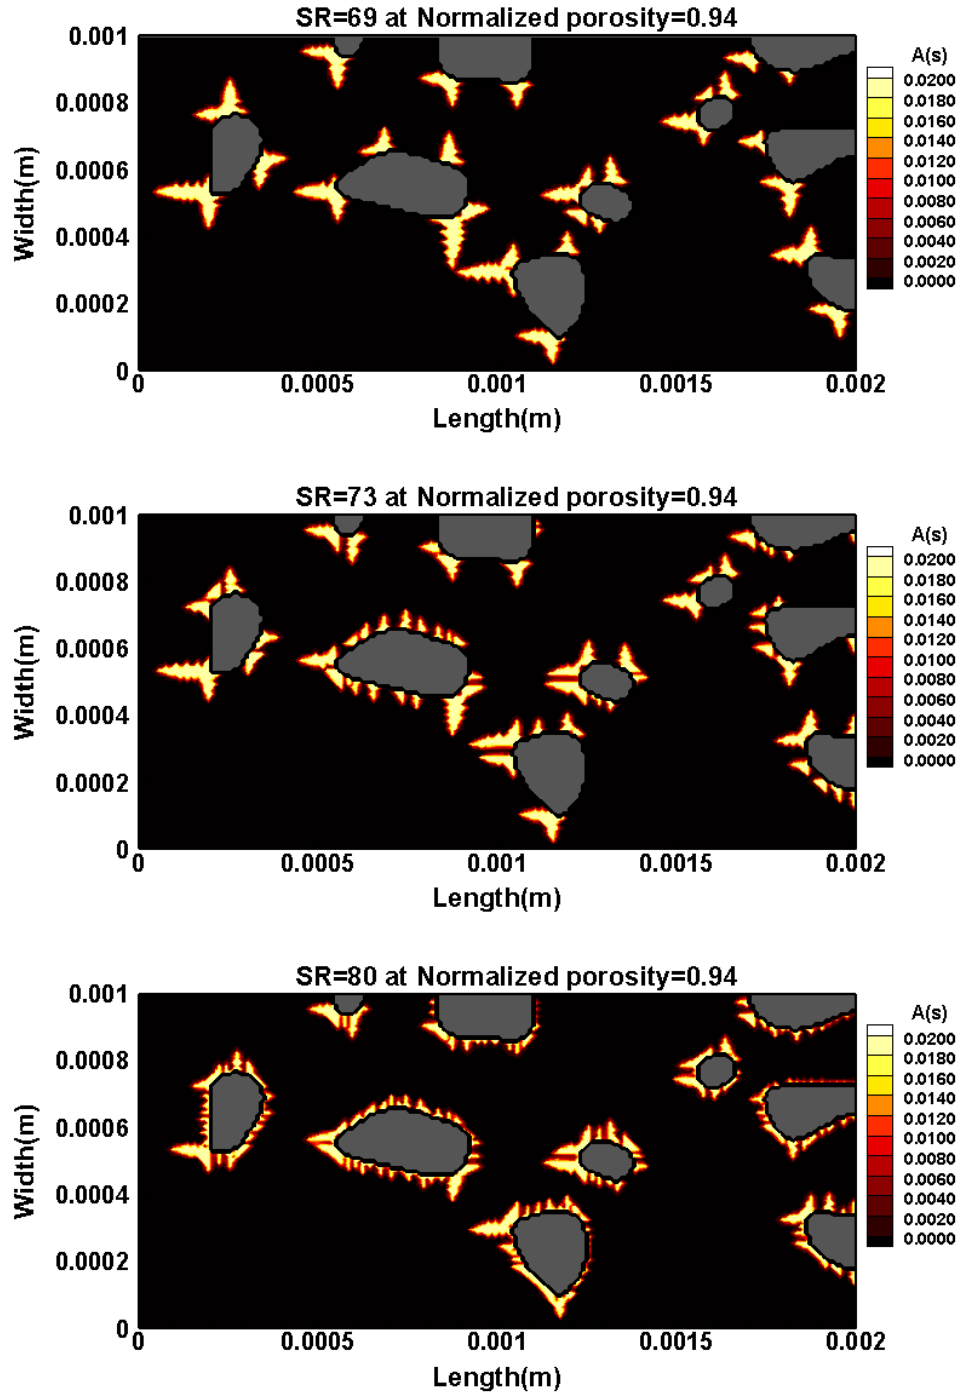

Figure S21. The amount of precipitated mineral in  $\text{mol.L}^{-1}$  for  $\Omega = 69$ , 73, and 80 when they all have the same normalized porosity = 0.94. The kinetic rate constant for this case is  $5 \times 10^{-5} [\text{mol.m}^{-2}.\text{s}^{-1}]$ . The initial average flow velocity is  $2.3 \times 10^{-6} [\text{m.s}^{-1}]$  for this scenario.

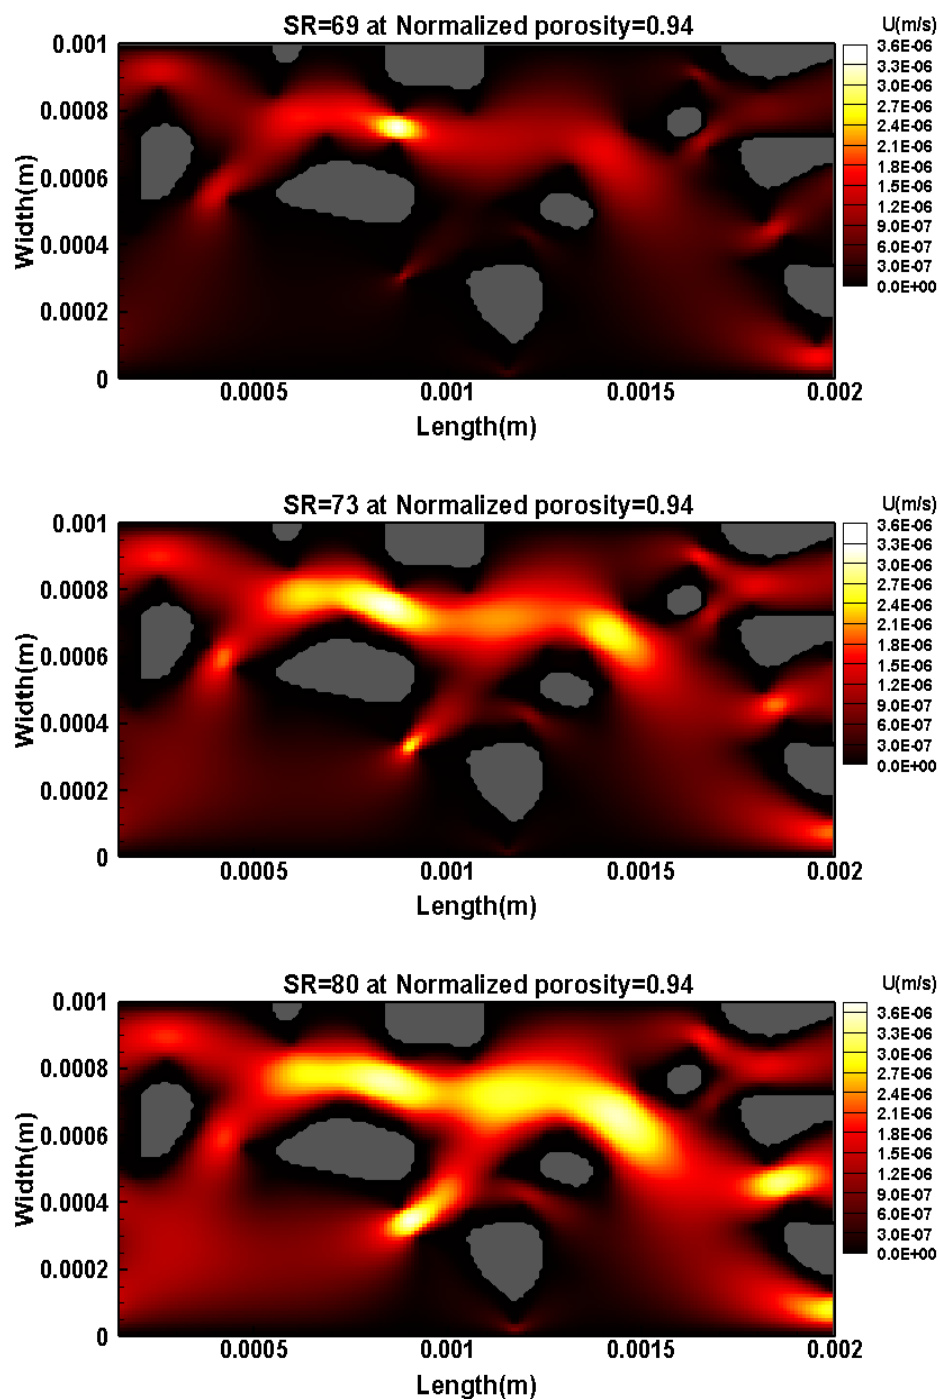

**Figure S22.** The velocity profile for  $\Omega = 69, 73$ , and  $80$  when they all have the same normalized porosity =  $0.94$ . The kinetic rate constant for this case is  $5 \times 10^{-5} \text{ [mol.m}^{-2}.\text{s}^{-1}]$ . The initial average flow velocity is  $2.3 \times 10^{-6} \text{ [m.s}^{-1}]$  for this scenario.

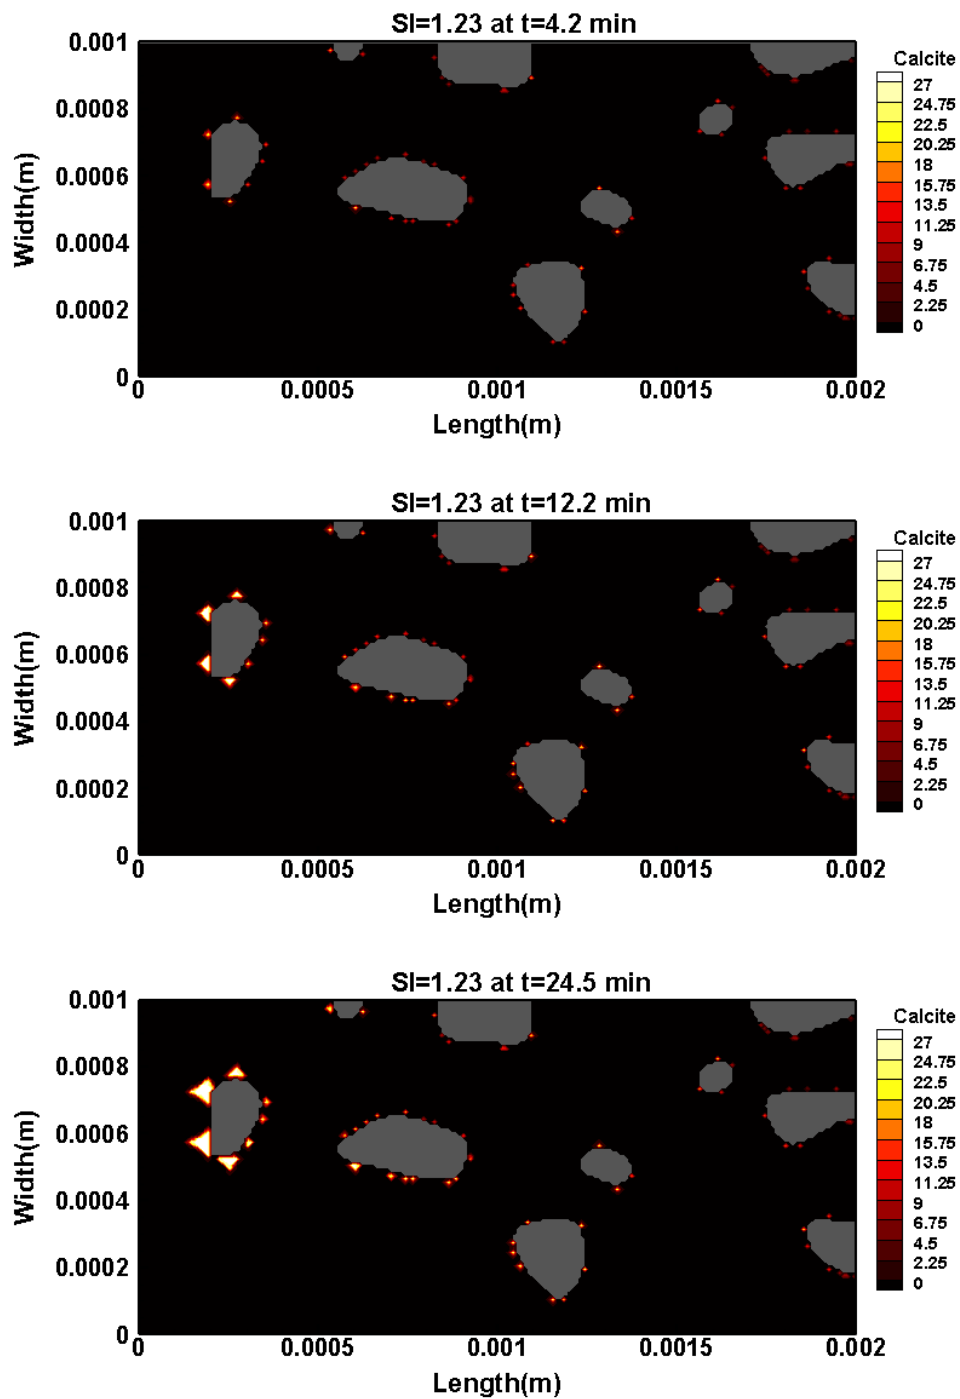

**Figure S23.** Temporal evolution of the amount of precipitated mineral in  $\text{mol.L}^{-1}$  for  $\text{SI} = 1.23$  at  $t = 4.2$ ,  $12.2$ , and  $24.5$  minutes. In this case kinetic rate for calcite rate equation is 9 orders of magnitude higher than the real value. The initial average flow velocity is  $4.6 \times 10^{-7} \text{ [m.s}^{-1}\text{]}$  for this scenario.

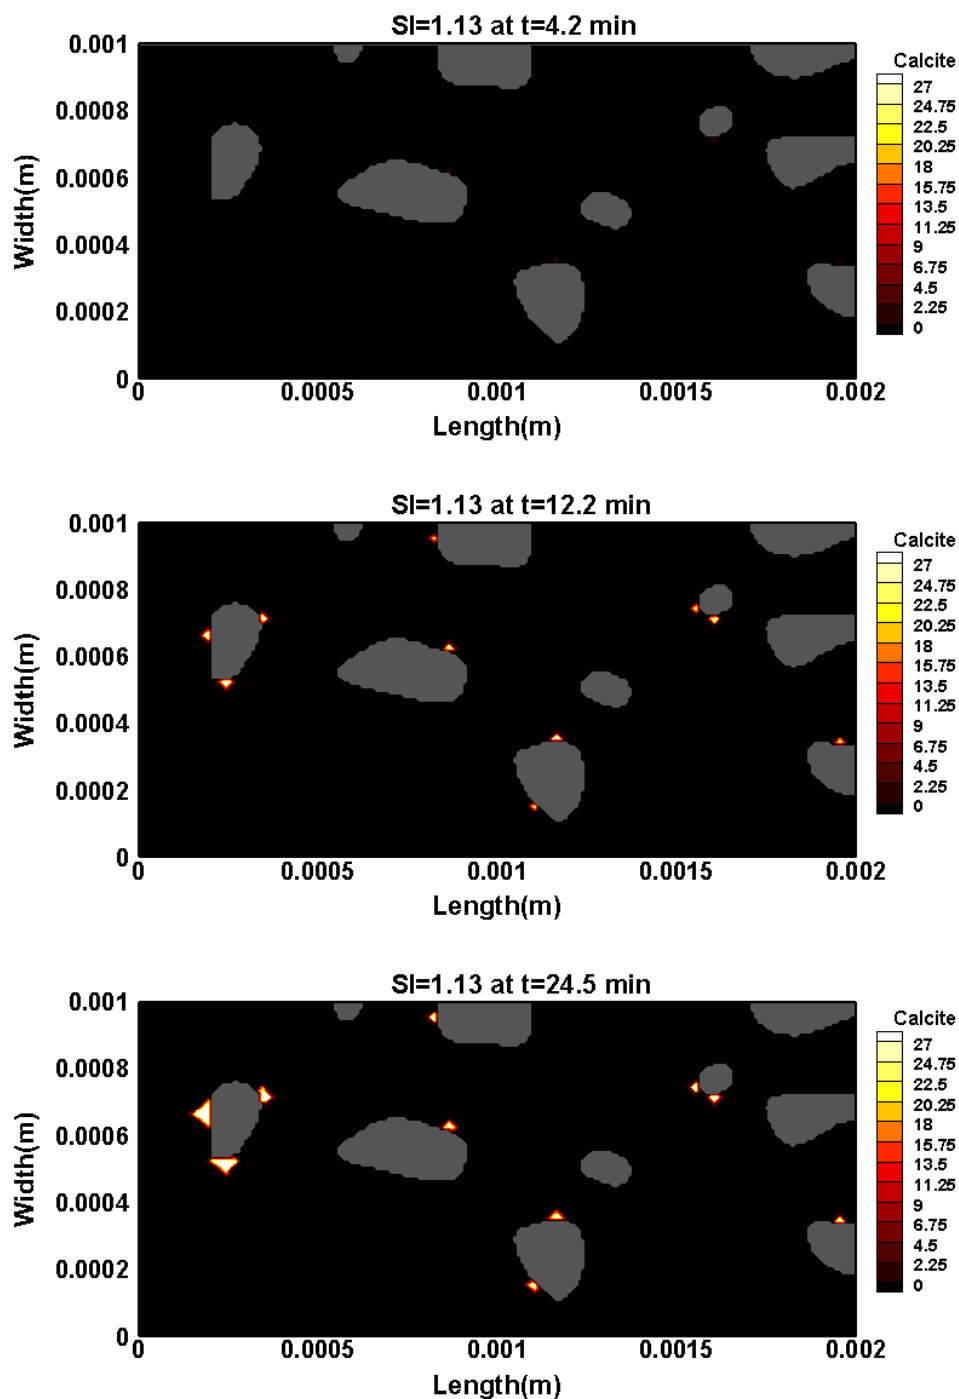

**Figure S24.** Temporal evolution of the amount of precipitated mineral in  $\text{mol.L}^{-1}$  for  $SI = 1.13$  at  $t = 4.2, 12.2$ , and  $24.5$  minutes. In this case kinetic rate for calcite rate equation is 9 orders of magnitude higher than the real value. The initial average flow velocity is  $4.6 \times 10^{-7} [\text{m.s}^{-1}]$  for this scenario.
